# Bibliometric mapping of glioma classification research through main path, key route, and K-core analyses

Kayode Ahmed<sup>1</sup> and Juan E. Núñez-Ríos<sup>2</sup>

<sup>1</sup>The University of Texas MD Anderson Cancer Center, Houston, TX 77030, USA

<sup>2</sup>Universidad Panamericana, Facultad de Ciencias Económicas y Empresariales, Zapopan, Jalisco 45010, México

**Correspondence to:** Kayode Ahmed, **email:** kmahmed@mdanderson.org

**Keywords:** glioma research; social network analysis; socio-clinical domains; web of science; networks

**Received:** September 22, 2025

**Accepted:** February 27, 2026

**Published:** March 31, 2026

**Copyright:** © 2026 Ahmed and Núñez-Ríos. This is an open access article distributed under the terms of the [Creative Commons Attribution License](#) (CC BY 4.0), which permits unrestricted use, distribution, and reproduction in any medium, provided the original author and source are credited.

## ABSTRACT

**Burgeoning technological and clinical advances have significantly reshaped glioma classification. To assess the evolution of these changes, we analyzed bibliometric data from Web of Science to explore patterns in the socio-clinical domains of glioma classification research. Using network analysis, we built a direct citation network linking articles to authors, focusing on citations. Main Path Analysis provided an overview of research evolution, Key Route Analysis identified influential papers, and K-core analysis revealed densely connected articles. The network comprised 46,204 nodes and 231,432 arcs, highlighting DNA methylation profiling's role in advancing molecular biomarker-based classification models. KRA emphasized advanced imaging and molecular techniques as key drivers, while K-core analysis identified articles cited at least 19 times. The findings indicate that the subset of articles focusing on glioma classification that incorporate social factors is relatively scarce in the analyzed data, in contrast to the prominence of epigenetic and imaging factors in the literature. Unlike previous studies that focused primarily on metrics such as the h-index, our approach identifies the limited but notable mention of social factors in glioma classification research, thereby highlighting a thematic gap. Through quantitative network analysis complemented by narrative interpretation, we uncovered patterns and substructures that offer deep insights into the evolving research landscape.**

## INTRODUCTION

Gliomas are the most common intracranial tumors, accounting for approximately 32% of all central nervous system (CNS) tumors and 81% of malignant brain tumors in the United States [1]. Classifying gliomas is crucial for identifying distinct biological or pathological traits that aid the selection of appropriate treatments, optimize therapeutic strategies, and improve prognostic outcomes [2].

The current World Health Organization (WHO) classification of gliomas is based on histopathological features and molecular markers [3]. While understanding the biological and genetic aspects of gliomas are crucial for diagnosis and treatment, social factors also play an important role in patient outcomes. Factors like

socioeconomic status, social isolation, and education can significantly affect the course of the disease. By considering these social elements in the socio-clinical domain of glioma research and classification, healthcare providers can better address the challenges of glioma diagnosis and management, leading to improved care and support for patients [4, 5].

Despite the relevance of social factors as risk factors contributing to the development of oncological diseases, their integration into glioma classification systems has received considerably less attention than traditional histopathological and molecular approaches [6, 7]. This omission possibly limits the ability to develop more holistic classification models that reflect not only the biological characteristics of the tumor, but also the social conditions that shape access to diagnosis, therapeutic

adherence, and clinical outcomes. As a result, the link between the social context and the evolution of gliomas remains a black box for clinicians and researchers; hence, the classification of gliomas should move beyond the reductionist view that limits it to a purely biomedical issue, overlooking the systemic complexity of the disease and the contributory role of social factors.

With approximately six thousand articles published on glioma in 2023 [8, 9], glioma classification and prognosis are extensively researched. However, the large number of publications makes it challenging to keep up with clinical and social developments in the field. Bibliometric analysis (BA) effectively manages large data sets and improves understanding of the knowledge generated, mainly using computational methods [10]. In the context of glioma research, [11] and [12] indicated that BA often focuses on analyzing collaborations between countries, institutions, or research groups, without contextual emphasis on the social aspects of the disease. [6, 7]. Hence, the primary purpose of this study is to map the evolution of glioma classification research, emphasizing the integration (or lack thereof) of clinical and social factors. To this end, we conducted a bibliometric analysis using data from the Web of Science (WoS) database, specifically, a network of direct citations (elaborated with the cited references (CR) field of the WoS records) to identify the intellectual structure and relational dynamics that have shaped this field of study [13]. To analyze the structure of the aforementioned network, the following network techniques were used: (1) Main Path Analysis (MPA) to identify the central evolutionary trajectory in the network, seeking to identify the sequence of key articles that have defined the development of the field; (2) Key Route Analysis (KRA) to complement the analysis and reveal multiple critical routes or alternative trajectories that connect approaches, techniques and scientific communities, thus revealing interdisciplinary convergence; and (3) K-core analysis, to identify densely connected parts of the network, showing more consolidated thematic communities and highlighting the groups of articles that form the current methodological and conceptual basis of glioma classification. This combination of techniques provides a unique contribution by identifying key influential works and uncovering the structural properties of the knowledge network driving glioma classification research. Unlike previous bibliometric reviews that focus almost exclusively on quantitative impact metrics, our approach highlights the evolutionary logic of the field by identifying critical interdisciplinary bridges between clinical, molecular, and social dimensions. This enables us to propose an integrative framework for glioma classification, highlighting the need to incorporate social factors into diagnostic and prognostic models for a more comprehensive understanding of the disease.

Our systematic approach to the synthesis of this study is as follows: First, we reviewed the literature on glioma classification, examining both medical perspectives

and other literature reviews. Second, in the methodology section, we detail our approach in analyzing bibliometric data, including the use of MPA, KRA, and K-core, offering a comprehensive framework for professionals. Finally, we conclude with a brief discussion of the social factors implicated in glioma classification.

This study is intended for the multidisciplinary team involved in glioma research and management, including healthcare professionals, researchers, and academics—especially for those exploring advancements in glioma research and bibliometric network analysis.

## RELATED WORKS

This section presents studies that have examined the methods and characteristics of classifying gliomas using WoS as the primary source of information. This database was selected because it covers a wide range of topics, has a rigorous publication selection process, and provides various options for downloading data [14].

[15] and [16] classified bibliometric studies on gliomas into two categories: non-systematic and systematic. Non-systematic contributions seek to review and evaluate concepts, methods, and theories to understand glioma classification techniques better. Under the bibliometric approach, systematic studies analyze and identify new areas of study and evaluate the development of techniques to improve pathological assessment and effective treatments. Both perspectives seek to bridge the theoretical and practical domains of neuro-oncology. Thus, studies on glioma and its classification seek to connect evidence-based approaches with management paradigms in neuro-oncology. [17] reported that prior works have focused on the evolution of molecular biology and imaging techniques to improve classification and drug design. Accordingly, [6, 18], and [19] agreed that studies focus on the following areas:

1. *Evolution in fundamental histological classifications:* [7] and suggest that efforts in this line of research focus on revising histological classifications of gliomas, focusing on their microscopic appearances and behaviors. This path has been crucial in distinguishing between different types of gliomas, such as astrocytomas, oligodendrogliomas, and glioblastomas, based on histopathological features [20]. However, the accuracy of the results remains a significant limitation because the subjective interpretation of glioma histopathological features affects the effectiveness of treatment decisions.
2. *Diagnostic history:* It is considered fundamental to study the classification of gliomas. It has evolved from autopsies and macroscopic inspections to integrating model molecular markers [21].
3. *Glioma epigenetics:* The main feature is that studying DNA methylation patterns has added complexity to

classifying gliomas. The identification of the glioma CpG island methylator phenotype (G-CIMP) and its association with IDH mutations and prognosis has refined our understanding of glioma biology and gliomagenesis [22, 23].

4. *Use of biomarkers and advances in molecular studies:* Advances in biomarkers such as IDH1 and IDH2, TP53, TERT, and ATRX have allowed a more accurate classification of gliomas, improving diagnosis of the disease and prediction of the disease [24, 25].
5. *Histological studies:* Microscopic analysis of abnormal glial cells is important in this classification, as it provides vital information on cell size, genetic alterations, and tissue nature. These analyses allow the development of microlevel analyses of abnormal cells, which help to create predictive models to improve treatments [20, 26].
6. *Imaging studies:* This area highlights the collaboration between disciplines such as medicine, bioengineering, and informatics, which has developed sophisticated instruments to capture and analyze images. These studies have led to better disease detection and prognosis, as well as preoperative and postoperative segmentation of tumors for better genetic characterization and classification of gliomas [23, 27, 28].

The ideas mentioned above show that from a non-systematic perspective, glioma research focuses on specific areas, which has allowed advances in the understanding, technical aspects, and complex processes of glioma analysis. In contrast, the systematic or quantitative analysis of the bibliometric data has improved the understanding of this field [29]. [30] and [31] indicate that the literature review articles on glioma classification focus on several key areas:

1. *Advances or developments in research techniques:* In this aspect, [32] and [33] have explored collaboration between researchers, highlighting the incorporation of genetic and molecular features to monitor mutations and improve accuracy in lesion prediction. Collaborative research groups are vital in glioma classification, facilitating sharing information and resources to solve complex problems. [34] reported how researchers from different countries collaborated to standardize MRI diagnostic procedures and protocols during crises.
2. *Diagnosis and treatment:* In this area, we can mention the work of [35] and [36], who mapped collaborative networks, finding advances in MRI and computational simulations to generate high-definition images. They highlight that collaborative structures allow the formation of interdisciplinary networks that improve consensus and allow the exploration of aspects inaccessible to individual researchers. [26] highlighted

how collaboration between geneticists, oncologists, bioinformaticians, and engineers improved the processing of electronic signals to detect gliomas.

3. *Histopathological classifications and biochemical advances:* [31] analyzed articles on glioblastoma, histology and biochemistry, using exploratory analysis and correlation techniques. They found that research on glioblastoma multiforme has stagnated due to lack of funding, although literature highlights its heterogeneity and dangerousness.
4. *Image classification, artificial intelligence, and robotics applications:* [37] performed meta-analyses to evaluate the efficacy of diagnostic and robotic surgical interventions supported by preoperative volumetric imaging. They concluded that robotic surgery is still exploratory and requires standardization of safety models, requiring interdisciplinary collaboration and increased funding [38]. They used VOSviewer to map collaborative relationships between institutions and analyzed common terms related to artificial intelligence and image classification techniques. [39] investigated the use of artificial intelligence to improve glioma diagnosis through image analysis by representing information using network visualization.

Most of the studies cited in this section employ BA to study the structure of the scientific community working on glioma-related topics rather than their classification. BA usually examines collaborations, citations, productivity, and predominant authorship. Some studies take a quantitative approach to analyze conceptual or thematic structure and often report descriptive statistics or discuss aspects such as innovation in diagnostic techniques. Table 1 includes some of the studies covered in our review and briefly outlines the search strategy with focus on understanding gliomas. Each article was individually reviewed by two authors in the creation of this table.

Regarding social factors, [43, 44], and [45] converge by exploring the relationship between symptoms and quality of life in patients with diffuse glioma. They mapped symptoms to identify associations between depression, cognition, and brain tumor-related symptoms, creating symptom networks and analyzing their correlations. Although they did not address social risk factors implicated in gliomagenesis, they demonstrated that SNA could unveil the multidimensionality of symptoms in glioma studies.

Our article focuses on the following questions: *What disciplinary approaches impact glioma classification, what factors have been considered to broaden this classification, and what social factors are associated with glioma classification?* Incorporating social factors is crucial because, from a genomics perspective, it would lead to a more accurate prediction of patient prognosis and survival outcomes compared to

**Table 1: Search strategy from articles reported in literature review**

| Study | Database               | Search strategy                     | Search query                                                                                                                                                                                                                                                                                                                                                                                                                                                                                                                                                                                                                                                                                                                                                                                                                                                                                                          | Analysis type               | Goal                        |
|-------|------------------------|-------------------------------------|-----------------------------------------------------------------------------------------------------------------------------------------------------------------------------------------------------------------------------------------------------------------------------------------------------------------------------------------------------------------------------------------------------------------------------------------------------------------------------------------------------------------------------------------------------------------------------------------------------------------------------------------------------------------------------------------------------------------------------------------------------------------------------------------------------------------------------------------------------------------------------------------------------------------------|-----------------------------|-----------------------------|
| [40]  | WoS Core Collection    |                                     |                                                                                                                                                                                                                                                                                                                                                                                                                                                                                                                                                                                                                                                                                                                                                                                                                                                                                                                       | Meta-analysis               | Diagnosis and treatment     |
| [30]  | Medline                | By topic                            | .mp.<br>(antiangiogenic or anti-angiogenic).<br>mp.                                                                                                                                                                                                                                                                                                                                                                                                                                                                                                                                                                                                                                                                                                                                                                                                                                                                   | Meta-analysis               | Treatment efficacy          |
| [37]  | Cochrane and PubMed    | By concept or glioma characteristic | AND (biopsy OR biopsies)<br>AND (robot OR robotic)                                                                                                                                                                                                                                                                                                                                                                                                                                                                                                                                                                                                                                                                                                                                                                                                                                                                    | Correlation                 | Robotics application        |
| [31]  | Scopus                 | By terms                            | Glioblastoma Multiforme, GBM, Glioblastoma, and Grade IV Glioma                                                                                                                                                                                                                                                                                                                                                                                                                                                                                                                                                                                                                                                                                                                                                                                                                                                       | Correlation                 | Advances in glioma research |
| [21]  | PubMed, WoS and Scopus | By keywords                         | glioma, ischemia, memory, aging, cognitive impairment, Alzheimer,                                                                                                                                                                                                                                                                                                                                                                                                                                                                                                                                                                                                                                                                                                                                                                                                                                                     | Manual examination          | Advances in glioma research |
| [27]  | PubMed                 | By keywords                         | “diffuse intrinsic pontine glioma”, “pontine glioma”, or “midline glioma”                                                                                                                                                                                                                                                                                                                                                                                                                                                                                                                                                                                                                                                                                                                                                                                                                                             | Manual examination          | Epigenetics                 |
| [18]  | PubMed                 | By terms                            | ”glioma”                                                                                                                                                                                                                                                                                                                                                                                                                                                                                                                                                                                                                                                                                                                                                                                                                                                                                                              | Latent Dirichlet allocation | Topic identification        |
| [41]  | WoS Core Collection    | By terms                            | “social cognition” OR “theory of mind” OR “mentaliz*» OR “empath*» OR “emotion recognition” OR “social problem solving” OR “social skills” OR “cognit*» OR “memory” OR “execut*» OR “attention” OR “information speed” OR “visual construction”) AND (“brain tumour*» OR “brain tumor*» OR “brain neoplasm*» OR “intracranial neoplasm*» OR “brain cancer*» OR “intracranial tumour*» OR “intracranial tumor*» OR “glioma*» OR “meningioma*» OR “primary central nervous system lymphoma*» OR “brain metastases” OR “brain metastasis” “social cognition” OR “theory of mind” OR “mentaliz*» OR “empath*» OR “emotion recognition” OR “social problem solving” OR “social skills” OR “cognit*» OR “memory” OR “execut*» OR “attention” OR “information speed” OR “visual construction”) AND (“meningioma*» OR “neurinoma*» OR “lowgrade glioma*» OR “low-grade glioma*» OR “primary central nervous system lymphoma*» | Manual examination          | Topic identification        |

|      |                     |          |                                                                                                                                                                                                                                                                                                                                                                                                                                                                                                                                                                                                                                                                                                                                                                                                                                                                                            |                        |                                                          |
|------|---------------------|----------|--------------------------------------------------------------------------------------------------------------------------------------------------------------------------------------------------------------------------------------------------------------------------------------------------------------------------------------------------------------------------------------------------------------------------------------------------------------------------------------------------------------------------------------------------------------------------------------------------------------------------------------------------------------------------------------------------------------------------------------------------------------------------------------------------------------------------------------------------------------------------------------------|------------------------|----------------------------------------------------------|
| [38] | WoS                 | By topic | <p>Title (Oncology* or neoplasms* or oncol-ogys*) AND (artificial intelligence* or machine learning* or deep learning* or neural network* or logistic regression* or random forest* or support vector machine* or fuzzy logic* or computer vision* automatic programming* or speech understanding* or autonomous robots* or intelligent tutoring* or intelligent agents* or neural network* or voice recognition* or text mining*.</p> <p>Publication Indexes= Science Citation Index Expanded (SCI-expanded), Social Sciences Citation Index (SSCI), Arts &amp; Humanities Citation Index (A&amp;HCI), Conference Proceedings Citation Index- Science (CPCI-S), Conference Proceedings Citation Index- Social Science &amp; Humanities (CPCI-SSH), Emerging Sources Citation Index (ESCI), Current Chemical Reactions (CCR-Expanded), Index Chemicus (IC).</p> <p>Timespan=All years.</p> | Descriptive statistics | Artificial intelligence and machine learning application |
| [35] | WoS Core Collection | By terms | <p>TI=(an*esthesia or an*esthetic or narcotic or Propofol or etomidate or Opioid or *fentanyl or morphi* or Dexmedetomidine or midazolam or *caine or *flurane or ketamine or naltrexone or naloxone) AND TS=(tum*t or neoplasm or cancer or carcinoma) NOT TS=(non-cancer or “chronic pain”) AND TS=(prognos*s or outcome or recurrence or “overall survival” or “recurrence free survival” or “relapse-free survival” or proliferation or invasion or metastas*s) NOT TI=guideline or recommendation or consensus or “case report” or meta or review) AND Language=English</p>                                                                                                                                                                                                                                                                                                           | Relational analysis    | The influence of anesthesia on tumor prognosis           |
| [36] | Scopus              | By terms | (intra-arterial) AND (therapy OR treatment) AND (brain tumor OR glioma)                                                                                                                                                                                                                                                                                                                                                                                                                                                                                                                                                                                                                                                                                                                                                                                                                    | Descriptive analysis   | Therapies for brain tumors treatment                     |

|      |                     |            |                                                                                                                                                                                                                                                                                                                                                                                                                                                                                                                                                                                                                                                                                                                                                                                                                                                                                                                                          |                                        |                                                          |
|------|---------------------|------------|------------------------------------------------------------------------------------------------------------------------------------------------------------------------------------------------------------------------------------------------------------------------------------------------------------------------------------------------------------------------------------------------------------------------------------------------------------------------------------------------------------------------------------------------------------------------------------------------------------------------------------------------------------------------------------------------------------------------------------------------------------------------------------------------------------------------------------------------------------------------------------------------------------------------------------------|----------------------------------------|----------------------------------------------------------|
| [6]  | WoS Core Collection | By terms   | <p>“Oncolytic virus*» OR “Oncolytic virotherap*» ((brain OR “central nervous system” OR CNS OR intracranial) NEAR/1 (cancer* OR anticancer* OR tumor* OR tumour* OR oncology OR neoplasm* OR carcinoma* OR lymphoma*)) OR meningioma* OR astrocytoma* OR oligodendroglioma* OR oligoastrocytoma* OR glioma* OR glioblastoma* OR neuroblastoma* OR “leptomeningeal disease*» OR “leptomeningeal carcinomatosis*» OR “ependymoma*» OR “subependymoma*» OR “gangliocytoma*» OR “ganglioglioma*» OR “ganglioneuroma*» OR “ganglioneuroblastoma*» OR “chordoma*» OR “notochordal cell tumor*» OR “notochordal cell tumour*» OR “schwannoma*» OR “neurilemmoma*» OR “neurinoma*» OR “spinal cord tumor*» OR “spinal cord tumour*» OR “extradural tumor*» OR “extradural tumour*» OR “intradural extramedullary tumour*» OR “intradural extramedullary tumor*» OR “intradural intramedullary tumour*» OR “intradural intramedullary tumor*»</p> | Correlation coefficient                | Topic identification                                     |
| [22] | WoS Core Collection | By topic   | <p>(“acute myeloid leukemia” OR “AML”) AND (“targeted therapy*”)</p>                                                                                                                                                                                                                                                                                                                                                                                                                                                                                                                                                                                                                                                                                                                                                                                                                                                                     | Statistical analysis                   | Topic prediction                                         |
| [12] | WoS Core Collection | By terms   | <p>TI = “glioma stem cell*” OR TI = “glioblastoma stem cell*” OR TI = “GBM stem cell*” OR TI = “GBM stem-like cell*” OR TI = “brain tumor-initiating cell*” OR TI = (“cancer stem cell*” AND (“brain” OR “glioma ” OR “glioblastoma” OR “GBM”)) OR TI = “glioma progenitor cell*”</p>                                                                                                                                                                                                                                                                                                                                                                                                                                                                                                                                                                                                                                                    | Correlation analysis                   | Topic prediction                                         |
| [42] | WoS                 | By keyword | <p>(“machine learning” OR “deep learning” OR “artificial intelligence” OR “radiomics”)</p>                                                                                                                                                                                                                                                                                                                                                                                                                                                                                                                                                                                                                                                                                                                                                                                                                                               | Descriptive and correlational analysis | Artificial intelligence and machine learning application |
| [39] | WoS Core Collection | By keyword | <p>(“brain” or “cerebrum” or “encephalon” or “pericranium” or “cerebral*” or “central nervous system”</p>                                                                                                                                                                                                                                                                                                                                                                                                                                                                                                                                                                                                                                                                                                                                                                                                                                | Correlation analysis                   | Advances or developments in research techniques          |

classifications based only on histology and traditional clinical parameters alone [2, 41]. Furthermore, it could lead to the efficient utilization of available resources for adequate patient care.

Thus, our BA differs from previous ones in that it seeks to utilize information on social factors in glioma classification, research, and management to foster awareness regarding the importance of integrating social factors into glioma research, improve screening and documentation of social factors by incorporating them into specialty guidelines, and reporting results in a stratified manner. Incorporating social factors to enhance existing classification and diagnostic modalities that assess glioma risk can inform optimal personalized patient care practices. SNA allows for managing large amounts of heterogeneous data in databases such as WoS and unveiling relationships that traditional analytical methods do not capture [46, 47].

## METHODOLOGY

We developed a search strategy to identify relevant literature on glioma research through BA while ensuring methodological transparency. Filters, impact, time window, and specific inclusion and exclusion criteria used to pragmatically select articles that comprise the data are presented in Table 2. Boolean operators were applied to minimize ambiguity and accurately intersect key terms related to glioma and bibliometric techniques. The use of TS (Title, Abstract, Keywords) rather than ALL facilitated a focused yet comprehensive retrieval, minimizing irrelevant results while encompassing relevant studies. Terms such as “systematic review” and “meta-analysis” were incorporated to identify bibliometric reviews that synthesize research trends. The final query was iteratively refined to ensure its robustness and reproducibility in bibliometric research. Thus the adopted research query was: (TS=(“glioma” OR “brain tumor” OR “neuro-oncology” OR “cancer research” OR “glioblastoma” OR “astrocytoma” OR “oligodendroglioma”) AND TS=(“bibliometric analysis” OR “science mapping” OR “citation analysis” OR “co-word analysis” OR “co-citation” OR “systematic review” OR “meta-analysis”)) AND PY=(2015–2024) AND DT=(“Article” OR “Review”).

Data collection, processing, and analysis followed the approach proposed by [48]. A brief description of the steps adopted is given below:

### Data acquisition

The bibliometric dataset was obtained from Web of Science (WoS) Core Collection, which aggregates peer-reviewed literature from multiple disciplines and provides standardized citation and reference metadata suitable for network analysis. We selected WoS for its

rigorous indexing criteria, consistent citation format, and broad coverage of high-impact journals in neuro-oncology and related fields. We recognize that other databases can provide bibliometric data, such as Scopus, whose coverage usually overlaps or coincides with that of WoS. However, simultaneously integrating databases into a network-based study requires metadata curation and standardization processes that tend to increase the network’s structural noise without guaranteeing substantive changes to the identified paradigmatic core. In this sense, for the construction of networks, priority was given to the quality and homogeneity of the metadata offered by WoS [14] over absolute comprehensiveness of coverage.

The retrieved records included complete bibliographic information (title, authors, affiliations, abstract, keywords), cited references, and citation counts, enabling the construction of targeted citation networks and the subsequent application of main path analysis, key route analysis, and k-core decomposition. The selected time window (2015–2024) considers two primary aspects: first, the rapid updates of glioma classification frameworks following the incorporation of molecular biomarkers in the 2016 and 2021 WHO classifications [49, 50]; and second, the proliferation of studies based on computational approaches and multi-omic methodologies applied to the study of gliomas [51, 52].

The timepoint from 2015–2024 in WoS yielded 2,488 records according to the criteria defined in Table 2 and taking up the ideas of [53]. Given the significant changes in classification paradigms since 2018, we restricted our analysis to this period, aiming to capture methodologically and conceptually important contributions, as recommended by [54]. This timepoint (2018–2024) in WoS yielded 2,079 records which met criteria in Table 2 and was utilized for our analysis, indicating that 409 articles were excluded from our initial search result. The search string combined terms related to classification (such as “classification framework” and “subtype classification”) with terms specific to bibliometric analysis and systematic reviews, excluding from the outset clinical or therapeutic articles that do not explicitly address classification. Secondly, the results were filtered by document type (articles and reviews only), language (English), and source (WoS Core Collection only), which considerably reduced the initial universe. Thirdly, an impact filter was applied, considering only articles published in quartile one or quartile two journals and highly cited works. This approach is in line with the principle of cumulative advantage in citation networks, where a few highly influential works tend to concentrate a considerable proportion of citations and act as key nodes for the evolution of a field [55].

The configuration or combination of filters earlier described may introduce bias toward consolidated core

**Table 2: Inclusion and exclusion criteria definition**

| Criteria                        | Description                                                                                                                             | Application                                                                                                                                                                                                                                                                                                                              |
|---------------------------------|-----------------------------------------------------------------------------------------------------------------------------------------|------------------------------------------------------------------------------------------------------------------------------------------------------------------------------------------------------------------------------------------------------------------------------------------------------------------------------------------|
| Type of literature              | Studies for understanding and expanding glioma classification are explored or analyzed                                                  | Inclusion:<br>Articles that: consider genetic, molecular, clinical factors, application of advanced techniques, patient care, or social aspects<br>Exclusion:<br>Grey literature, working papers, newsletters, editorial letters, treatments, or therapies without analyzing grading factors, individual case studies, drug application. |
| Type of source                  | The location or origin of the studies to be analyzed may be an aspect that allows an article to be included or rejected in the dataset. | Inclusion:<br>Articles from journals or conferences.<br>Exclusion:<br>Book chapters.                                                                                                                                                                                                                                                     |
| Impact source                   | The reputation and impact of information sources is an aspect that must be verified to provide valuable data for analysis.              | Inclusion:<br>Q1 or Q2 sources and highly cited articles.<br>Exclusion:<br>Q3, Q4 sources.                                                                                                                                                                                                                                               |
| Language                        | Studies that are available in English, given the prevalence of this language in the international scientific literature.                | Exclusion:<br>Studies published not in English.                                                                                                                                                                                                                                                                                          |
| Period                          | Our study aims to identify social factors that may impact glioma classification. Therefore, it is crucial to collect up-to-date data.   | Inclusion:<br>From 2018–2024.<br>Exclusion:<br>Studies prior to 2018.                                                                                                                                                                                                                                                                    |
| Accessibility                   | It is important to be able to access both the database to retrieve the information and to access the articles.                          | Exclusion:<br>Not accessible articles.                                                                                                                                                                                                                                                                                                   |
| Relevance to research questions | Studies should be relevant in the context of the research questions posed as well as relate to the analytical perspective of interest.  | Inclusion:<br>Relevant to at least two research questions.<br>Exclusion:<br>Duplicated studies or studies that do not add new information to the existing classification criteria, omitting socio-genomic criteria.                                                                                                                      |

Source: Adapted from [56].

results, which may be dominated by contributions oriented toward molecular, epigenetic, and imaging approaches. However, the design does not stray from, and is consistent with, the objective of our study, which seeks to shape the intellectual backbone of glioma classification rather than perform an exhaustive mapping of peripheral or emerging contributions. Hence, supplementing the study with other databases, such as Scopus or Google Scholar, would expand the network; however, the heterogeneity and noise of their metadata make it challenging to construct true acyclic networks. We also recognize that the strategy adopted could underrepresent recent articles in interdisciplinary journals or in gray literature, which is often disseminated beyond the dominant neuro-oncology channels.

The textual workflow of our search strategy described above is succinctly depicted in Figure 1.

### Data cleaning and network elaboration

WoS2Pajek [57] was used to extract and organize the information in a network format. This tool allowed data cleaning and sorting, generating two two-mode networks: one for works and authors and another for works and keywords. This allowed us to get a first idea of the connections between these sets of nodes. Since these networks share a set of nodes (*works*), they can be transformed into a one-mode graph by multiplying networks, thus obtaining a network of keywords, journals, and co-authors.

### Analysis

Using SNA, we analyzed citations network (one-mode graph) [58]. We incorporated the ideas

of [59] and [60] and used Pajek V64 6.01 [61] as an analytical tool. Subsequently, to carry out the analysis, we selected three specific techniques: *MPA*, *KRA*, and *K-core decomposition*, so that the integration of these techniques is aligned with the primary goal proposed for our work as these techniques have proven their robustness in analyzing directed networks [62, 63]. Although techniques such as co-citation clustering or topic modeling can support the detection of latent conceptual clusters [64], they were not selected because they do not preserve the temporal directionality of the relationships or citations, which is a limitation and makes them unsuitable for approaching questions or problems about directed networks or trajectories for the construction of knowledge or the identification of critical paths of development of a given field [65]. In contrast, *MPA* and *KRA* are used in directed networks, which not only help identify thematic groups, as co-citation analysis does, but also allows for evaluating the evolution of a field and highlighting key works that serve as pivots in that process [62]. On the other hand, since topic modeling is a natural language processing technique, it is usually applied to full texts [66], which limits the reconstruction of a directed network that allows us to observe scientific influence and theoretical-methodological dependencies between studies [67].

### Degree distribution

Reporting the distribution of cited publications by year (Figure 2) and the network's degree distribution (Figure 3), provides a basis for the most relevant vertices [59]. It is worth mentioning that Figure 2 does not seek to illustrate only the annual scientific output on gliomas but

to reflect the temporal profile of the works that make up the direct citation network. This distinction is necessary because the objective is to understand how recent or how old the literature is, that forms the intellectual core of current research that underpins a particular field, i.e., the relative antiquity of the works that are used as a knowledge base [13, 62]. The time window choice is based on the suggestions of [68] and [69], who emphasized the need to analyze the recent state of the art without losing the historical link through direct citation networks. Thus, the network was not only shaped by the selected time window but also included all the references cited by these articles, thus covering a much broader time spectrum. Figure 2 shows a log-normal fit. This choice was based on the contributions of [70] and [55], who agree that when studying bibliographic networks, scientific works' citations accumulated over time tend to follow log-normal distributions. In this regard, [62] indicated that this is a typical emergent property in scientific citation networks, where a small fraction of seminal works continues accumulating citations for decades while most recent works have not yet reached citational maturity. This asymmetric distribution is what characterizes log-normal distributions [71]. This phenomenon, combined with documentary obsolescence [63], generates a log-normal distribution of the ages of cited references.

### Main path analysis

Applying *MPA* allows us to identify the main evolutionary path of a given field by revaluing the sequence of articles that have had the most significant cumulative impact on the configuration of the scientific network [58]. This is considered relevant for areas such as

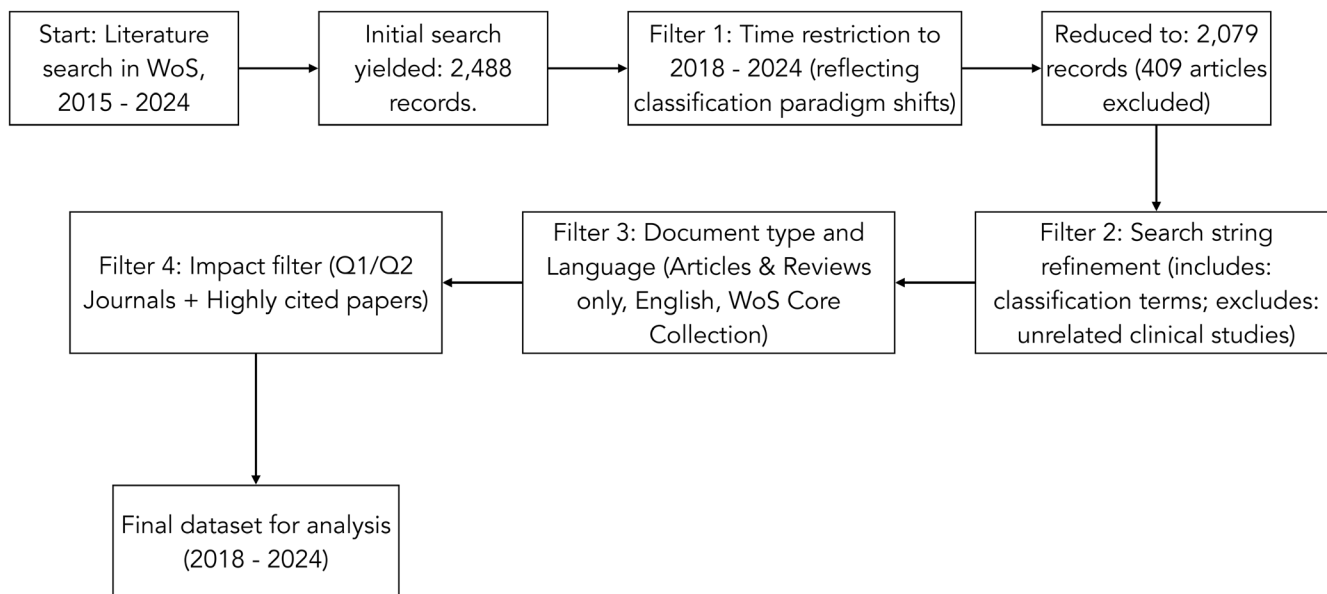

**Figure 1: Search workflow.** Source: Self-elaboration.

the study of gliomas, where knowledge evolves rapidly. The following notations describe the process:

- Considering  $G = (V, E)$  as a directed graph where:
  - $(V)$  set of vertices (scientific articles).
  - $(E)$  set of directed edges (citations), where a directed edge from  $(v_i)$  to  $(v_j)$  is denoted as  $(v_i, v_j)$ .
- A path in  $G$  is the sequence of edges:

$$p = \{(v_1, v_2), (v_2, v_3), \dots, (v_{n-1}, v_n)\} \quad (1)$$

- If we consider  $S \subseteq V$  as the set of source vertices without predecessors and  $T \subseteq V$  as the set of sink vertices without successors. In this case, each relation  $e = (v_i, v_j) \in E$  is assigned a transit weight  $w(e)$  that considers a displacement criterion and its frequency of occurrence in the trajectories. In this sense, the Search Path Count (SPC) can be defined as:

$$w_{\text{SPC}}(v_i, v_j) = \sum_{s \in S} \sum_{t \in T} \delta_{st}(v_i, v_j) \quad (2)$$

Where  $\delta_{st}(v_i, v_j)$  suggests the number of directed search paths from  $s$  to  $t$  in which the relation  $(v_i, v_j)$  is present at least once.

- Once the weights  $w_{\text{SPC}}$  are assigned to all edges, the path  $p^*$  maximizing the sum of the sum of the weights of the edges that compose it is sought. Subsequently, the path  $p^* \in P$  containing the consecutive edges  $\{e_1, e_2, \dots, e_k\}$  can be obtained by:

$$p^* = \arg \max_{p \in P} \sum_{e \in p} w_{\text{SPC}}(e) \quad (3)$$

We utilized Pajek [61] to calculate the SPC weights, which represent the set containing all directed, connected paths. The specific routine used was: Network > Acyclic Network > Create weighted Network + Vector > Transversal Weights > Search Path Count.

### Key route analysis

Employing KRA in directed networks complements MPA by identifying multiple critical paths, i.e., it not only includes the main path but also identifies parallel paths of high topological relevance that can connect key themes or methodologies [4], which is especially useful in interdisciplinary research where parallel or complementary lines of research may coexist. In the context of the citation network, we considered the following:

- Having transformed the network into an acyclic network and weighted it using path weights  $w(e)$  assigned to each edge  $e = (v_i, v_j) \in E$  in  $E$  from SPC, the weights quantify the importance of each citation in terms of the flow of trajectories that pass through it,

where  $w: E \rightarrow R^+$  is the function that indicates that a path weight is assigned to each edge.

- Based on the weighted network, the KRA first identifies a set of key edges, i.e., those with the highest weights. The edges are then sorted by weight in non-ascending order:

$$w(e_1) \geq w(e_2) \geq \dots \geq w(e_{|E|}) \quad (4)$$

The set of key edges are written as:

$$L = \{e_1, e_2, \dots, e_L\} \subseteq E, \quad (5)$$

where  $L$  represents the number of key routes indicated, which in our case was  $L = 10$ , thus, for each edge considered key  $e_{\ell} = (u_{\ell}, v_{\ell}) \in L$ , we aimed to form or construct the associated route by locally extending the trajectory forward and backward, considering the edge with the most significant weight. In general, we obtained: (a) an ascending path  $p_{\ell}$  that connects source nodes in  $S$  and (b) a descending path  $p_{\ell}^+$  that seeks to connect  $v_{\ell}$  with sink nodes in  $T$  by iteratively selecting the edge with the highest  $w(e)$ . Thus, by concatenating these segments, a complete directed path  $(p_{\ell})$  is produced for each key edge, which provides and traverses the sequence of relevant articles from the perspective of citation flow. Therefore, the set of key edges could be defined as:

$$P_{\text{key}} = \{p_{\ell} \mid e_{\ell} \in L\} \subseteq P \quad (6)$$

where  $P$  is the set of all directed paths in the network, in contrast to the global MPA (which produces a single main path), the KRA produces a set of paths that seeks to ensure the inclusion of the most significant links in terms of path weights to reveal patterns of divergence and convergence in the evolution of a given network. Appendix A shows the steps used in Pajek for this process.

### K-core analysis

The  $k$ -core decomposition approach was applied to identify densely interconnected substructures [72]. These structures usually correspond to consolidated scientific communities with theoretical and methodological frameworks or research agendas [72]. Considering that the  $k$ -core of a graph  $G$  denoted as  $G_k = (V_k, E_k)$ , is the induced subgraph of  $G$  such that:

$$V_k = \{v \in V \mid \deg_{G_k}(v) \geq k\}, \quad (7)$$

$$E_k = \{(u, v) \in E \mid u \in V_k, v \in V_k\} \quad (8)$$

Where  $\deg_{G_k}(v)$  is the degree of the vertex  $(v)$  in the subgraph  $G_k$ , i.e., the number of edges in  $G_k$  connected to the vertex  $(v)$ .

Intuitively, to find the k-core of a graph, the process can be understood as follows:

- (a) Remove all vertices in the graph  $G$  with a degree less than  $k$ .
- (b) After each removal, recalculate the degrees of the remaining vertices.
- (c) Iterate until no vertices are left with a degree less than  $k$ .

### Standardization of citation indicators by year and field

In addition to the citation count, normalized citation indicators at the article level were considered to estimate potential biases that could affect the construction of the main path. If  $TC_i$  is considered as the total number of citations for an article  $i$  that has been published in year  $y(i)$  in category  $f(i)$ . For each year  $y$ , the mean and standard deviation of citations were calculated:

$$\begin{aligned} \mu_y &= \text{mean}\{TC_i : y(i) = y\}, \\ \sigma_y &= \text{standard deviation}\{TC_i : y(i) = y\} \end{aligned} \quad (9)$$

From this, two standardized annual indicators are defined:

$$\text{rel\_TC\_year}_i = \frac{TC_i}{\mu_{y(i)}}, z\_TC\_year_i = \frac{TC_i - \mu_{y(i)}}{\sigma_{y(i)}} \quad (10)$$

Similarly, for each field-year combination  $(f, y)$ , the following was obtained:

$$\begin{aligned} \mu_{fy} &= \text{mean}\{TC_i : f(i) = f, y(i) = y\}, \\ \sigma_{fy} &= \text{standard deviation}\{TC_i : f(i) = f, y(i) = y\} \end{aligned} \quad (11)$$

Furthermore, the standardized indicators were defined by field and year as:

$$\text{rel\_TC\_fy}_i = \frac{TC_i}{\mu_{f(i)y(i)}}, z\_TC\_fy_i = \frac{TC_i - \mu_{f(i)y(i)}}{\sigma_{f(i)y(i)}} \quad (12)$$

Following the methodological framework described above, we present the results of the bibliometric analysis, emphasizing key patterns and development trajectories in research on glioma classification. The command lines in Pajek used to obtain the results are provided in Appendix A.

## RESULTS

Figure 2 illustrates the temporal distribution of cited scientific publications. This analysis provides an understanding of the temporal patterns of scientific production and its impact on the network of specific topics. The early phase (early 20th century to the 1960s)

suggests a moderate growth in citation frequency, which may be typical in systems where the diffusion of knowledge follows a sigmoidal pattern in the early stages. A low growth rate characterizes this period due to the low connectivity between authors corresponding to that period. From 1960 onwards, the citation rate grew, likely due to factors such as an increase in the number of researchers in the field and a rise in article production with the emergence of new journals.

Figure 2 also identifies a decrease in citation frequency after 2020. While this trend might initially suggest a saturation point, we acknowledge that this pattern must be interpreted with caution, as this decline could be attributed to recency effects, i.e., that more recent publications may not have sufficient time to accumulate citations, rather than an actual stagnation of research output. To mitigate this issue and avoid misleading trends due to incomplete citation data, we restricted our analysis to articles published until 2022. This methodological adjustment follows best practices in longitudinal bibliometric studies [67], where the inclusion of very recent data may distort temporal trends due to the lag in citation accumulation.

Additionally, we modeled the temporal distribution of citations using a log-normal function. The choice of this distribution is based on empirical evidence from prior bibliometric research [57], which has shown that the spread of scientific citations over time often follows a right-skewed distribution, where citation accumulation increases rapidly before reaching a peak and subsequently declines. The log-normal model effectively captures this asymmetric growth-decay pattern, aligning with established citation dynamics observed in large-scale scientific networks. This distribution has been widely employed in similar analyses to quantify the concentration of citations over time and to provide insights into how knowledge accumulates and diffuses within scientific fields [68, 73].

Formally, the probability density function of a log-normal distribution for a random variable  $X$  is given by:

$$f_X(x; \mu, \sigma) = \frac{1}{x\sigma\sqrt{2\pi}} \exp\left(-\frac{(\ln x - \mu)^2}{2\sigma^2}\right), \quad x > 0 \quad (13)$$

Where  $\mu$  and  $\sigma$  are the mean and standard deviation of the variable in the logarithmic space. Applying the model to the context of this paper, to model citation frequency as a function of year ( $y$ ) and assuming that  $X = 2022 - y$  fits a log-normal distribution,  $freq(y)$  could be expressed by:

$$\begin{aligned} freq(y) &= c \times \frac{1}{(2022 - y) \cdot b \cdot \sqrt{2\pi}} \exp\left(-\frac{(\ln(2022 - y) - a)^2}{2b^2}\right) \end{aligned} \quad (14)$$

where:

- $c = 164631.296$  is the scaling coefficient; it acts as a multiplicative factor that adjusts the width of the distribution to align it with the observed empirical frequencies.
- $a = 2.034$  location parameter, the mean of the logarithm of the variable (year shifted) in the distribution. In this context, it reflects the average year (shifted from 2022) when the citation frequency reaches its maximum. As the model is centered on 2022, the maximum average year is 2019–2020.
- $b = 1.033$  scaling parameter (standard deviation in log space), an indicator of the dispersion of citations around the peak year.
- $2022 - y$  and temporal transformation that centers the distribution on the year 2022.

Simplifying (8) the model could be expressed as:

$$\text{freq}(y) = c \times \text{LogNorm}(2022 - y; a, b) \quad (15)$$

We used Pajek [62] to produce some graphs. The first directed graph,  $G_1 = (V_1, E_1)$ , represents the citation network between scientific papers. In this graph, vertices  $v \in V_1$  represent scientific papers. There is a directed

relation  $(v, u) \in E_1$  if paper  $u$  has cited paper  $v$ . This allows for analyzing the influence and significance of scientific papers by illustrating their citations of each other, thereby identifying the most influential papers and the connections between different research.

$G_1$  contains 46,204 vertices and 231,432 arcs, with an average degree of 10.0178. This suggests that, on average, each paper in the network cites or is cited by approximately 10.01 other papers. The citation graph remains sparse, with a density of 0.00010841.

In Figure 3, the degree distributions adhere to a power-law distribution, i.e., the likelihood of a node having a degree  $k$  is defined by a function of the form  $P(k) \sim k^{-\gamma}$ , with  $\gamma$  as a positive exponent, with most nodes having low degrees and a few nodes exhibiting high degrees, reflecting the diversity of the literature in glioma classification. The high in-degree, peaking at 2691, indicates the presence of influential works that significantly impact the field, while the out-degree of 291 suggests a broad bibliographic scope, though over a thousand relevant articles are not included in the review process.

Table 3 highlights the 50 articles with the most citations, many from recent years (2019–2022), with Krichevsky’s 2019 paper [74] leading in citations (approximately 13%), focusing on oligonucleotide-based

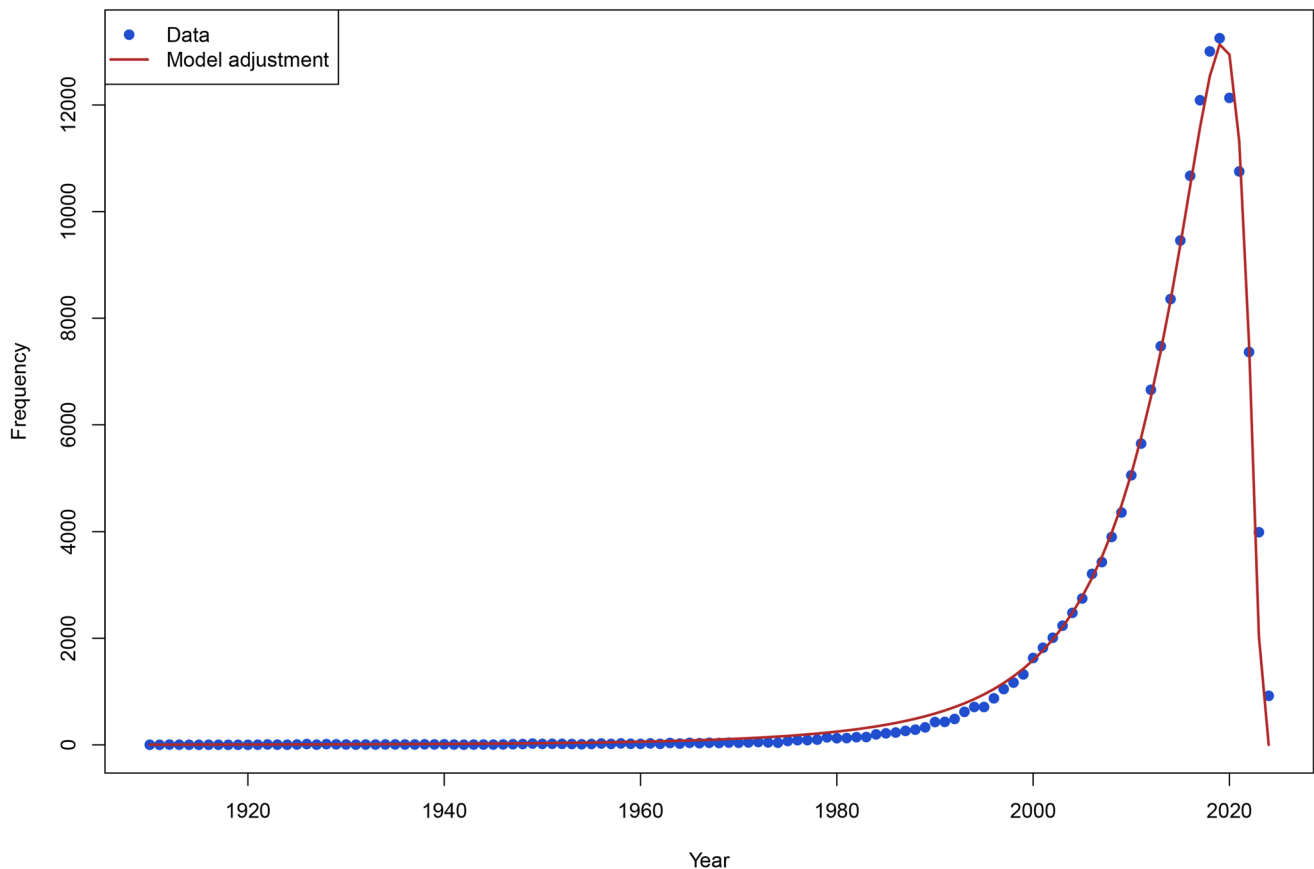

**Figure 2: Cited only publications by year.** Source: Elaborated following [61].

therapies for brain tumors. Other key articles include those by [11, 75, 76], and [77], which were cited 2278, 263, 255, and 239 times, respectively (accounting for 44% of citations), together with Krichevsky's work, represent interdisciplinary studies integrating knowledge on glioma therapies, molecular pathways, and immunotherapeutic strategies.

Table 4 highlights the most cited papers in  $G_1$ , including [49] paper with 2961 citations, which updates CNS tumor classification and emphasizes the integration of molecular and histological features in glioma classification and prognosis, and [50] paper, which is also highly cited (1304 citations) for providing critical information to neuropathology and oncology specialists, incorporating new tumor types and subtypes, redefining nomenclature, and implementing an integrated reporting system.

Other relevant articles include STUPP\_R(2005) 352:987 [78] and BRAT\_D(2015)372:2481 [79] with 786 and 745 citations, respectively; the former is pioneering in establishing the combined regimen of radiotherapy with temozolomide as an effective treatment for glioblastoma, while the latter revolutionized glioma classification by incorporating genomic data and identifying molecular subtypes that more accurately predict clinical

behavior than traditional histology. Additionally, YAN\_H(2009)360:765 [80] (676 citations) confirmed the survival benefit of adding temozolomide to radiotherapy in glioblastoma and ECKELPA\_J(2015)372:2499 [81] (523 citations) advanced the molecular classification of gliomas through the identification of mutations in TERT, IDH and 1p and 19q codeletion.

## Main path analysis

MPA made it possible to reconstruct the sequence of works that have accumulated the greatest flow of citations within the network, and with this, it is possible to say that the intellectual backbone or the central evolutionary trajectory that has shaped the field of research on glioma classification was identified. In this respect, this section not only describes the biomedical content of each work but also seeks to explain the way in which these works have acted as key nodes linking concepts, methodologies, and approaches.

Figure 4 shows the main path of research on glioma classification. Each node denotes a seminal work, and the directional edges trace the chronological and thematic progression. This visualization seeks

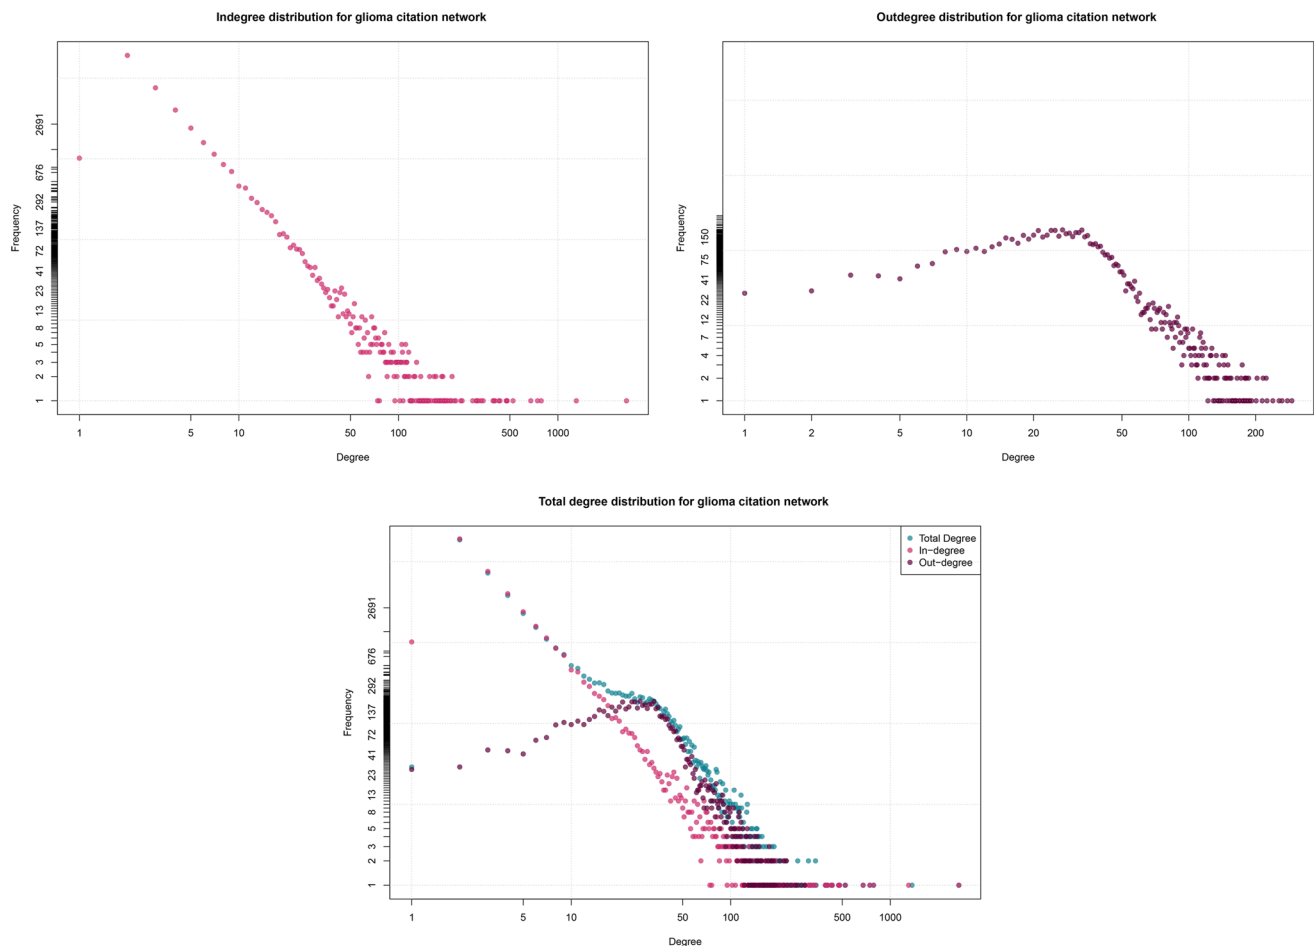

**Figure 3: In, out, and total degree distribution (log-log) for  $G_1$ .** Source: Elaborated following [61].

**Table 3: Articles that most cite other papers on  $G_1$  (outdegree based)**

| Rank | Frequency | Id                                       | Rank | Frequency | Id                                   |
|------|-----------|------------------------------------------|------|-----------|--------------------------------------|
| 1    | 291       | KRICHEVS_A(2019)16:319                   | 26   | 179       | SABU A(2022):2c03538                 |
| 2    | 278       | YANG K(2022)21:s12943-022-01513-z        | 27   | 179       | CHEN S(2021)26:417                   |
| 3    | 263       | WELLER M(2024)10:s41572-024-00516-y      | 28   | 178       | SCHEIE D(2019)127:265                |
| 4    | 255       | IUS T(2023)162:267                       | 29   | 176       | BALANA C(2022)13:865171              |
| 5    | 239       | SLEDZINS P(2021)22:ijms221910373         | 30   | 175       | MOREAU A(2019)9:01134                |
| 6    | 225       | BUCHLAK Q(2021)89:177                    | 31   | 174       | PICCA A(2023)23:1217                 |
| 7    | 223       | ONCIUL R(2024)46:2402                    | 32   | 174       | MIRCHIA K(2020)12:cancers12071817    |
| 8    | 223       | MELHEM J(2022)19:1705                    | 33   | 174       | SHAHZAD U(2021)13:cancers13071555    |
| 9    | 216       | MUZYKA L(2023)24:ijms241310456           | 34   | 172       | GUZMAN G(2023)196:76                 |
| 10   | 216       | VEGA J(2018)25:143                       | 35   | 172       | ROOSEN M(2022)143:427                |
| 11   | 214       | SHIKALOV A(2024)16:pharmaceutics16010100 | 36   | 170       | ALGHAMRI M(2021)12:680021            |
| 12   | 203       | D'AMATI A(2024)17:1268038                | 37   | 169       | LI C(2022)49:E1024                   |
| 13   | 203       | SHEN Y(2024)13:s40164-024-00512-8        | 38   | 165       | CIPRI S(2023)13:1204829              |
| 14   | 201       | TILAK M(2021)22:ijms22041831             | 39   | 165       | DEOCESAN C(2020)21:ijms21072611      |
| 15   | 192       | PITARCH C(2024)16:cancers16020300        | 40   | 164       | VANDENBE M(2023)402:1564             |
| 16   | 188       | SLEDZINS P(2024)112:63                   | 41   | 163       | LOCARNO C(2020)225:002               |
| 17   | 187       | WU P(2023)1405:31                        | 42   | 162       | CUI J(2022)12:1100                   |
| 18   | 186       | MCNAMARA C(2022)64:1919                  | 43   | 161       | SILANTYE A(2019)8:cells8080863       |
| 19   | 186       | BRAT D(2022)146:547                      | 44   | 160       | JOHNSON A(2022)12:995498             |
| 20   | 183       | AMIN J(2022)8:3161                       | 45   | 158       | FARES J(2024)6:fcae108               |
| 21   | 182       | SHARMA H(2020)151:1                      | 46   | 157       | BAUSART M(2022)41:s13046-022-02251-2 |
| 22   | 182       | FERRER V(2018)66:1542                    | 47   | 156       | KIM Y(2021)9:s40478-021-01151-4      |
| 23   | 181       | STEPANEN A(2024)15:1326753               | 48   | 155       | GARGINI R(2020)12:cancers12061622    |
| 24   | 180       | SANSONE G(2022)10:517                    | 49   | 155       | GONCALVE F(2021)12:733323            |
| 25   | 180       | LU Q(2019)8:342                          | 50   | 153       | AGGARWAL P(2022)13:1038096           |

Source: Self-elaboration using Pajek [62].

to highlight how a subset of works underpins the intellectual structure of the field, and to improve the clarity and readability of the results, Table 5 summarizes the key findings of the MPA. This table not only presents the papers that make up the main route but also emphasizes the specific bibliometric role of each one within the citation network. Instead of offering only a biomedical description of the articles, this synthesis highlights how each work acts as a key node that links concepts, methodologies, and approaches, outlining the theoretical and technical evolution in the classification of gliomas. Thus, the table shows in a structured way how the knowledge network has evolved, from the introduction of molecular classification to the integration of clinical, epidemiological, and imaging data. This format allows us to more clearly appreciate how the citation flow reflects the process of consolidation and

expansion of a scientific paradigm, thereby fulfilling the central purpose of bibliometric analysis.

In addition, we verified that the identified main path was not solely the result of the selected weighting method as we evaluated its robustness on the citation network by recalculating the edge weights using Search Path Count (SPC), Search Path Link Count (SPLC), and Search Path Node Pair (SPNP) in Pajek (Appendix A). Subsequently, we consider  $V^{(w)}$  and  $E^{(w)}$  as the set of vertices and edges, respectively, of the main path subgraph obtained under any of the schemes  $w \in SPC, SPLC, SPNP$ . Therefore, to quantify the degree of coincidence between paths, the Jaccard index was used at both the vertex and edge levels:  $J_V(w_1, w_2) = |V^{(w_1)} \cap V^{(w_2)}| / |V^{(w_1)} \cup V^{(w_2)}|$  and  $J_E(w_1, w_2) = |E^{(w_1)} \cap E^{(w_2)}| / |E^{(w_1)} \cup E^{(w_2)}|$ , where values close to 1 would indicate almost complete overlap between the compared structures. The results suggest that the three networks

**Table 4: Most cited articles on  $G_1$  (indegree based)**

| Rank | Frequency | Id                       | Rank | Frequency | Id                        |
|------|-----------|--------------------------|------|-----------|---------------------------|
| 1    | 2691      | LOUIS D(2016)131:803     | 26   | 217       | OSTROM Q(2019)21:V1       |
| 2    | 1304      | LOUIS D(2021)23:1231     | 27   | 215       | SCHWARTZ J(2012)482:226   |
| 3    | 786       | STUPP R(2005)352:987     | 28   | 212       | WELLER M(2017)18:E315     |
| 4    | 745       | BRAT D(2015)372:2481     | 29   | 205       | CAIRNCRO G(2013)31:337    |
| 5    | 676       | YAN H(2009)360:765       | 30   | 202       | WESSELIN P(2018)44:139    |
| 6    | 523       | ECKEL-PA J(2015)372:2499 | 31   | 198       | BUCKNER J(2016)374:1344   |
| 7    | 481       | VERHAAK R(2010)17:98     | 32   | 195       | HE K(2016):770            |
| 8    | 477       | LOUIS D(2007)114:547     | 33   | 193       | PHILLIPS H(2006)9:157     |
| 9    | 474       | CAPPER D(2018)555:469    | 34   | 192       | NOUSHMEH H(2010)17:510    |
| 10   | 433       | CECCAREL M(2016)164:550  | 35   | 191       | REUSS D(2015)129:133      |
| 11   | 427       | MENZE B(2015)34:1993     | 36   | 190       | OSTROM Q(2018)20:1        |
| 12   | 405       | HEGI M(2005)352:997      | 37   | 190       | HARTMANN C(2010)120:707   |
| 13   | 397       | BRENNAN C(2013)155:462   | 38   | 187       | BRAT D(2020)139:603       |
| 14   | 392       | OSTROM Q(2015)16:1       | 39   | 187       | SUZUKI H(2015)47:458      |
| 15   | 340       | PARSONS D(2008)321:1807  | 40   | 185       | WEN P(2008)359:492        |
| 16   | 330       | LOUIS D(2007)114:97      | 41   | 184       | GILLIES R(2016)278:563    |
| 17   | 318       | STUPP R(2009)10:459      | 42   | 180       | RONNEBER O(2015)9351:234  |
| 18   | 310       | BRAT D(2018)136:805      | 43   | 179       | WANG Q(2017)32:42         |
| 19   | 307       | BAKAS S(2017)4:117       | 44   | 174       | LOUIS D(2018)135:639      |
| 20   | 292       | CHIN L(2008)455:1061     | 45   | 172       | SHIRAHAT M(2018)136:153   |
| 21   | 251       | WEN P(2010)28:1963       | 46   | 172       | SUBRAMAN A(2005)102:15545 |
| 22   | 246       | STURM D(2012)22:425      | 47   | 171       | TURCAN S(2012)483:479     |
| 23   | 229       | VANDEN B(2013)31:344     | 48   | 168       | PATEL A(2014)344:1396     |
| 24   | 224       | WELLER M(2021)18:170     | 49   | 167       | VANGRIET J(2017)77:E104   |
| 25   | 217       | OSTROM Q(2014)16:896     | 50   | 167       | MACKAY A(2017)32:520      |

Source: Self-elaboration using pajek [62].

contain the same set of 61 articles and 60 edges, that is,  $V^{(SPC)} = V^{(SPLC)} = V^{(SPNP)}$  and  $E^{(SPC)} = E^{(SPLC)} = E^{(SPNP)}$ . Therefore, the Jaccard index is equal to 1 for both vertices and artists in the comparisons SPC vs. SPLC, SPC vs. SPNP, and SPLC vs. SPNP, implying that the main path is invariant with respect to the choice of path weighting scheme. Additionally, we seek to rule out or evaluate whether the route obtained using Pajek could be biased toward specific works with high citation impact, even after normalizing citations by year and by field/year. In this sense, we associated each article with four normalized citation indicators ( $rel\_TC_{year}$ ,  $z\_TG_{year}$ ,  $rel\_TC_{fy}$  and  $z\_TC_{fy}$ ) to compare the average values between the works that make up the main path and the rest of the network (Table 6).

The results in Table 6 suggest that the items outside the main path showed mean values and z-scores close to zero ( $rel\_TC_{year} \approx 1.00$ ,  $z\_TC_{year} \approx 0.00$ ;  $rel\_TC_{fy}$

$\approx 1.00$ ,  $z\_TC_{fy} \approx 0.00$ ), while the items that make up the main path exhibited slight deviations ( $rel\_TC_{year} \approx 1.03$ ,  $z\_TC_{year} \approx 0.03$ ;  $rel\_TC_{fy} \approx 0.97$ ,  $z\_TC_{fy} \approx 0.04$  in absolute value). When considering the results together, it is possible to say that the differences are small in terms of standard deviation, suggesting that the main path was not formed exclusively by extraordinary works, as indicated by their normalized citations, but rather by articles whose impact is comparable to the field average. In other words, their identification responds primarily to the structure of the citation network rather than to biases in relative impact metrics.

### Key route analysis

The application of KRA to the citation network of glioma classification revealed a more complex knowledge flow than the single evolutionary track identified through



**Table 5: Main path analysis: Frameworks of research on glioma classification**

| Source                                                 | Methodological contribution                             | Role in main path                                | Clinical correlates                    |
|--------------------------------------------------------|---------------------------------------------------------|--------------------------------------------------|----------------------------------------|
| Acta Neuropathologica [51]                             | DNA methylation and Random Forest classification.       | Initiates molecular paradigm shift.              | Redefines glioma taxonomy.             |
| Acta Neuropathologica [82]                             | t-SNE and clustering for molecular classification.      | Refines classification for subgroups.            | Adapts diagnostics for rare gliomas.   |
| Acta Neuropathologica [83]                             | Molecular biomarkers in IDH-wildtype glioma.            | Bridges molecular biology and clinical practice. | Enables molecular-based prognosis.     |
| Brain Pathology [84]                                   | PDGFRA, CDKN2A, CDK4 biomarkers for IDH-mutant gliomas. | Enhances risk stratification.                    | Improves prognosis tools.              |
| Acta Neuropathologica [85]                             | Updates WHO IDH-mutant astrocytoma guidelines.          | Institutionalizes molecular classification.      | Standardizes clinical decisions.       |
| Neuro-Oncology [50]                                    | Integrates molecular and histological WHO criteria.     | Establishes a global classification.             | Sets glioma diagnostic reference.      |
| Neuro-Oncology [86]                                    | Links molecular classification with epidemiology.       | Connects taxonomy with public health.            | Provides incidence and survival data.  |
| Journal of Clinical Medicine [87]                      | Sex disparities in glioblastoma outcomes.               | Expands classification with demographics.        | Highlights sex as a prognostic factor. |
| Journal of Neuro-oncolgy [88]                          | Sex-specific glioma survival with molecular markers.    | Combines molecular and demographic data.         | Improves personalized treatment.       |
| Korean Journal of Radiology [89]                       | MRI biomarkers for CDKN2A/B deletion.                   | Links molecular and imaging markers.             | Advances non-invasive diagnosis.       |
| Journal of Medical Imaging and Radiation Oncology [23] | MRI and molecular data integration.                     | Strengthens multimodal diagnostics.              | Promotes imaging-genetics synergy.     |
| Neuroradiology [90]                                    | T2-FLAIR patterns and glioma subtypes.                  | Reinforces imaging molecular integration.        | Enhances pre-surgical assessment.      |
| Neuroradiology [91]                                    | Clinical/imaging predictors for IDH2 mutation.          | Bridges molecular, imaging, and clinical data.   | Improves early diagnosis.              |

**Table 6: Normalized citation indicators for papers within and outside the main path**

| Group                | <i>n</i> | mean_rel_TC_year | Mean_z_TC_year | Mean_rel_TC_fy | Mean_z_TC_fy |
|----------------------|----------|------------------|----------------|----------------|--------------|
| Off the main path    | 6828     | 0.9997           | -0.0002        | 1.0002         | -0.0003      |
| Within the main path | 53       | 1.0268           | 0.0313         | 0.9681         | 0.0429       |

The identified main path contains 61 vertices. However, the normalized citation analysis was restricted to the 53 articles for which complete metadata were available in the Web of Science Core Collection, including publication year, subject category, and citation counts within the 2018–2024 observation window. The remaining eight vertices correspond to cited references that do not have source records indexed in Web of Science; therefore, they were excluded from the computation of normalized citation indicators.

is considered relevant as it allows us to identify influential hubs or scientific communities regarding density and connectivity. This approach allows us to understand the internal structure of knowledge in the context of the network articles and highlight nodes or articles that play a critical role in disseminating topics or methodological approaches and in the connection between scientific disciplines.

The maximum number of cores for this subgraph is 19 (Table 8). Once the network cores had been identified,

extracting the *core* corresponding to the highest value of *k* was displayed graphically, ensuring that the drawing had no more than one hundred nodes to avoid overload.

Table 8 presents the results of the citation network in the context of our work. It should be recalled that *k* – *core* are maximal subgraphs where each node, in this case article, has at least *k* connections to other vertices. We find a range of cores from *k* = 0 to *k* = 19, with 46,204 nodes analyzed. The largest proportion of articles is found at

$k - core = 2$  (representing 40.59% of the nodes), suggesting that a substantial portion of the works are weakly connected, i.e., most nodes have at least two connections but fail to achieve high levels of cohesion.

Since we are looking for the most cited articles within the network, we focus on cluster 19, which represents articles with the highest number of citations that are considered key references or reviews in glioma research. It contains 360 articles representing 0.7792% of all nodes in our network. Given that the vertices of this subgraph have at least 19 connections to other nodes in the network, this could indicate that these articles are not only relevant because of their high citation counts but may also be fundamental to the dissemination of crucial knowledge and methodologies in the study of gliomas. Their removal could negatively affect the network's cohesion and structural integrity.

For the selection of  $k$ , we considered different subgraph sizes, selecting those with a coreness greater than or equal to  $k$ . Based on the partition, the maximum coreness obtained was 19. Hence, a  $k - core = 15$  or equal to 18, the size of the induced graph is gradually reduced from 3,301 nodes (7.14% of the network) to 1,103 vertices (2.39%). In the same vein, moving from  $k - core = 18$  to 19 resulted in a contraction to 360 vertices, indicating that  $k = 19$  yields a non-trivial, structurally relevant core. Additionally, the robustness of the selected core was evaluated considering threshold variations by recalculating  $k$  in a range [15, 25] to review its composition, observing that in a feasible range  $k \leq 19$ , nodes with coreness 19 are part, by definition, to the lower-order  $k - core$  in such a way that the articles that define the paradigmatic core are also present in  $G_k$  for  $k = 15 - 18$ , and what changes

with the decrease in  $k$  is that works with a better degree of structural incrustation are incorporated. The above can be expressed as  $N_{19} = v: coreness(v) = 19$ . It can be verified that  $N_{19} \subseteq G_k$  for all  $k \in \{15, 16, 17, 18, 19\}$  and that, in  $k > 19$ , the core is empty, so no stricter threshold produces an interpretable substructure.

Based on the above, and from a structural perspective, the choice of threshold  $k$  involved capturing the most interconnected core of the field, while relaxing the thresholds expands the graph structure by incorporating more recent works or emerging nodes that have not yet migrated to what can be considered the paradigmatic core. Along these lines, we do not seek to specifically quantify the number of emerging nodes that would enter the  $k - core$  under different thresholds or integrate additional altimetric indicators, as this would mean moving away from the methodological design, and we consider these to be future lines of work that could enrich the reconstruction of the paradigmatic core presented.

Figure 6 shows that the subgraph is highly interconnected. However, all nodes have at least 19 connections to other nodes within the same subgraph, suggesting that each article is highly cited and cites extensively other influential works within the core. This visualization also allows displaying a hierarchy of nodes by different sizes, which was adjusted using the total degree, where larger nodes represent articles with more connections within the  $k - core$ . The degree of centrality of these articles may suggest systematic reviews, consensus studies, or papers that have introduced new paradigms or methodologies in glioma research. They also serve as connectors of different thematic areas, facilitating collaboration and interdisciplinary development.

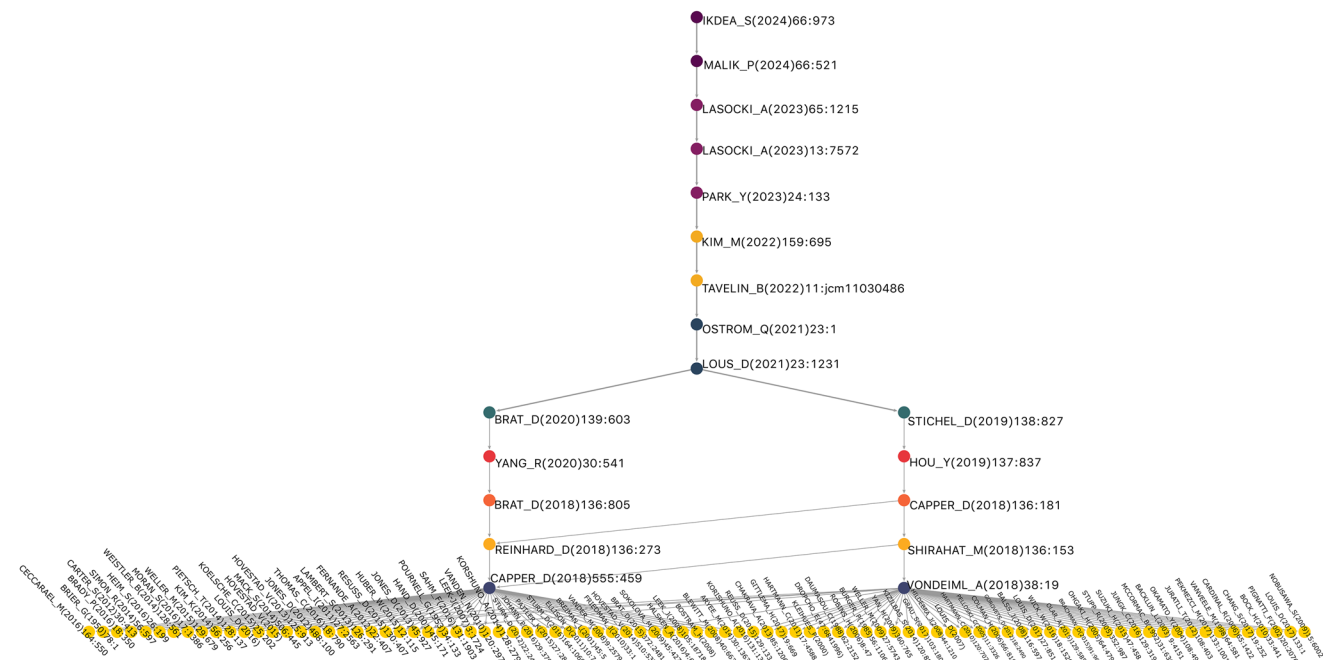

**Figure 5: Key route for the glioma research network.** Source: Elaborated following [62].

**Table 7: Key route analysis: Complementary research on glioma classification**

| Source                                                 | Methodological contribution                              | Role in main path                                | Clinical correlates                    |
|--------------------------------------------------------|----------------------------------------------------------|--------------------------------------------------|----------------------------------------|
| Acta Neuropathologica [51]                             | DNA methylation and Random Forest classification.        | Initiates molecular paradigm shift.              | Redefines glioma taxonomy.             |
| Acta Neuropathologica [82]                             | t-SNE and clustering for molecular classification.       | Refines classification for subgroups.            | Adapts diagnostics for rare gliomas.   |
| Acta Neuropathologica [83]                             | Molecular biomarkers in IDH-wildtype glioma.             | Bridges molecular biology and clinical practice. | Enables molecular-based prognosis.     |
| Seminars in Neurology [92]                             | Evolution from histological to molecular classification. | Links past and modern paradigms.                 | Improves diagnostic accuracy.          |
| Acta Neuropathologica [93]                             | CDKN2A/B deletion and CNV load for grading.              | Adds genomic criteria to classification.         | Enhances risk stratification.          |
| Acta Neuropathologica [94]                             | Molecular diagnostics in clinical routine.               | Validates real-world applicability.              | Improves diagnostic reliability.       |
| Acta Neuropathologica [95]                             | Addresses misclassification due to morphology.           | Highlights value of molecular profiling.         | Reduces diagnostic errors.             |
| Acta Neuropathologica [52]                             | RNA sequencing in FFPE samples.                          | Expands molecular pathology toolkit.             | Provides new therapeutic targets.      |
| Brain Pathology [84]                                   | PDGFRA, CDKN2A, CDK4 biomarkers for IDH-mutant gliomas.  | Enhances risk stratification.                    | Improves prognosis tools.              |
| Acta Neuropathologica [85]                             | Updates WHO IDH-mutant astrocytoma guidelines.           | Institutionalizes molecular classification.      | Standardizes clinical decisions.       |
| Neuro-Oncology [50]                                    | Integrates molecular and histological WHO criteria.      | Establishes a global classification.             | Sets glioma diagnostic reference.      |
| Neuro-Oncology [86]                                    | Links molecular classification with epidemiology.        | Connects taxonomy with public health.            | Provides incidence and survival data.  |
| Journal of Clinical Medicine [87]                      | Sex disparities in glioblastoma outcomes.                | Expands classification with demographics.        | Highlights sex as a prognostic factor. |
| Journal of Neuro-oncolgy [88]                          | Sex-specific glioma survival with molecular markers.     | Combines molecular and demographic data.         | Improves personalized treatment.       |
| Korean Journal of Radiology [89]                       | MRI biomarkers for CDKN2A/B deletion.                    | Links molecular and imaging markers.             | Advances non-invasive diagnosis.       |
| Journal of Medical Imaging and Radiation Oncology [23] | MRI and molecular data integration.                      | Strengthens multimodal diagnostics.              | Promotes imaging-genetics synergy.     |
| Neuroradiology [90]                                    | T2-FLAIR patterns and glioma subtypes.                   | Reinforces imaging molecular integration.        | Enhances pre-surgical assessment.      |
| Neuroradiology [91]                                    | Clinical/imaging predictors for IDH2 mutation.           | Bridges molecular, imaging, and clinical data.   | Improves early diagnosis.              |

Based on the above, the studies by [86] and [50] provide updated frameworks for glioma classification, marking a shift from histological to molecular-based approaches, integrating markers like IDH mutations, 1p and 19q codeletion, and TERT promoter mutations. This evolution in classification is further refined by the work of [94] and [96], which introduced DNA methylation-based methods. The integration of biomarkers, as

discussed in [84] and [85], supports the robustness and prognostic value of molecular systems, enabling better patient stratification.

Further advancements in glioma stratification are reflected in studies by [3, 16, 18, 90, 92], and [54], which combine histological, molecular, and morphological data into complex classification algorithms, improving predictive power for clinical outcomes.

**Table 8: K-cores in glioma research network**

| Cluster | Freq  | Freq (%) | CumFreq | CumFreq (%) | Representative                     |
|---------|-------|----------|---------|-------------|------------------------------------|
| 0       | 112   | 0.2424   | 112     | 0.2424      | LIAO_Y(2020)99:0000000000021002    |
| 1       | 38    | 0.0822   | 150     | 40.9207     | CARVER E(2019)21:61                |
| 2       | 18757 | 40.5961  | 18907   | 40.9207     | BORMANN F(2018)23:3407             |
| 3       | 7432  | 16.0852  | 26339   | 57.0059     | BRANCATO_V(2022)14:cancers14112731 |
| 4       | 4042  | 8.7482   | 30381   | 65.7540     | GANESHAN B(2013)266:326            |
| 5       | 2607  | 5.6424   | 32988   | 71.3964     | GROVE O(2015)10:0118261            |
| 6       | 1791  | 3.8763   | 34779   | 75.2727     | BAILEY O(1986)12:261               |
| 7       | 1522  | 3.2941   | 36301   | 78.5668     | KERN M(2020)20:1                   |
| 8       | 1216  | 2.6318   | 37517   | 81.1986     | KOBAYASH K(2021)11:2               |
| 9       | 1080  | 2.3375   | 38597   | 83.5361     | SAWLANI V(2020)11:1                |
| 10      | 951   | 2.0583   | 39548   | 85.5943     | KOELSCHE C(2021)12:4               |
| 11      | 871   | 1.8851   | 40419   | 87.4794     | PROVENZA J(2006)239:632            |
| 12      | 853   | 1.8462   | 41272   | 89.3256     | SHUKLA G(2017)6:28                 |
| 13      | 824   | 1.7834   | 42096   | 91.1090     | DAVNALL F(2012)3:573               |
| 14      | 807   | 1.7466   | 42096   | 92.8556     | ARONEN H(1994)191:41               |
| 15      | 867   | 1.8765   | 43770   | 94.7321     | LIU J(2018)173:400                 |
| 16      | 853   | 1.8462   | 44623   | 96.5782     | CINARER G(2020)10:app10186296      |
| 17      | 478   | 1.0345   | 45101   | 97.6128     | GAO M(2020)10:01676                |
| 18      | 743   | 1.6081   | 45844   | 99.2208     | CHO H(2018)6:5982                  |
| 19      | 360   | 0.7792   | 46204   | 100.0000    | LOUIS D(2021)23:1231               |

Source: Elaborated based on [62].

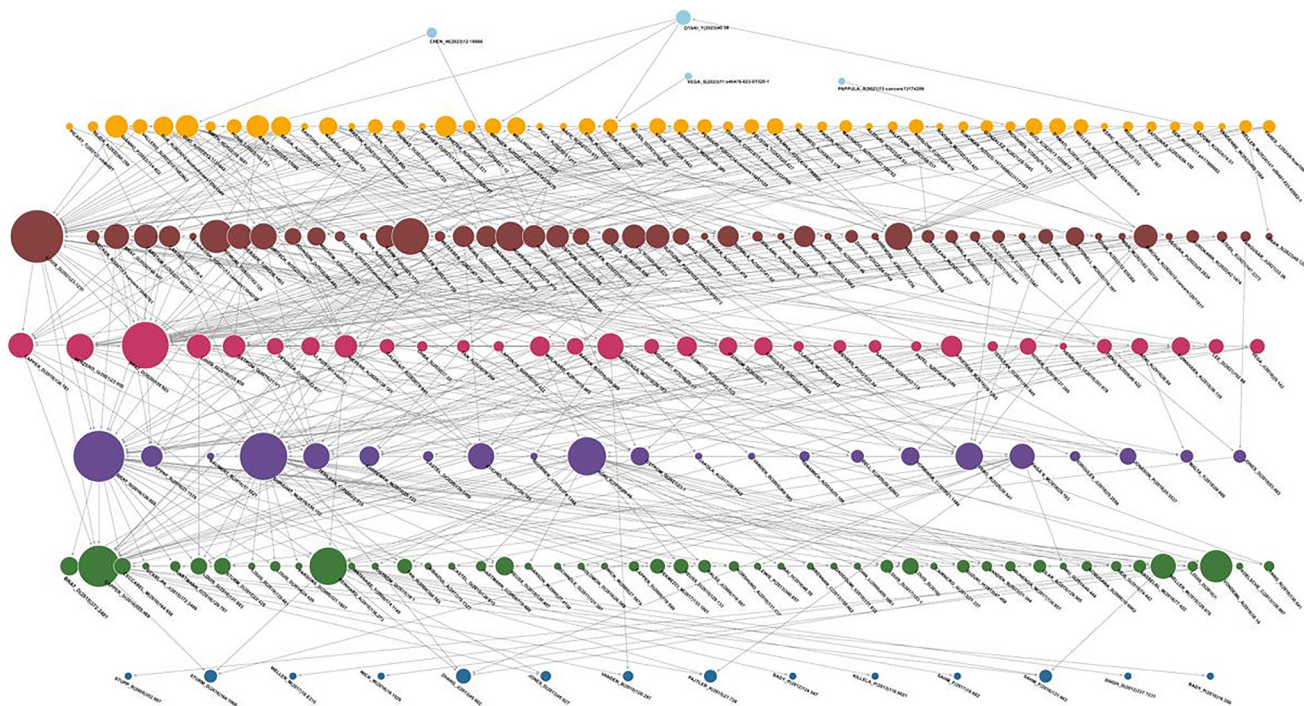

**Figure 6: Subgraph based on k-core = 19 for the glioma research network.** Source: Elaborated following [62].

## DISCUSSION

In summary, our work sought to deepen and provide a structured view of research focused on the classification of gliomas using network analysis as the primary tool. First, we reviewed the distribution of publications cited by year, which allowed us to identify how knowledge evolved or accumulated through inflection points or periods in which there were significant increases in citations, which, in the context of this work, were found to occur starting in 2002. The first objective was achieved by identifying the distribution of degrees in the direct citation network and found the three most cited articles by [49], [50], and [78] correspond to updates in tumor classification and the impact of radiotherapy application. In addition, the application of MPA and KRA helped identify influential articles and critical connections that allowed us to understand how different areas of knowledge in neuro-oncology have evolved. Unlike the work of [6, 41], and [22], which focused on grouping topics, our results show chronological development and evolution based on the interconnection and influence of methods.

[12, 36, 38], agreed that the impact of studies can only be measured through citation counts or centrality metrics. However, we believe that, if taken as definitive data, these metrics can offer an incomplete perspective of a citation network, leading to inadequate identification of critical articles that act as turning points and influence the adoption of new methodologies or the negotiation and adoption of interdisciplinary approaches. Furthermore, by relying solely on input data, the complexity of knowledge development is overlooked.

We also state that the similarity of our work with the reviewed literature lies in the relevance of introducing molecular biomarkers for the classification of gliomas, as demonstrated by [24, 25, 92] and [94] who have also highlighted the need to go beyond traditional histological techniques, proposing classifications based on DNA methylation and genetic alterations, which are more accurate. The application of MPA reinforces this idea by placing these studies as part of key pathways in the knowledge network, suggesting how this work has facilitated the integration of molecular approaches and driven their incorporation into clinical practice. In contrast, unlike the proposals of [18, 31] and [39], which are limited to identifying prominent authors or collaborative groups, our network approach illustrates how ideas and research efforts are interconnected with emerging subfields, highlighting the relevance of these studies, not only as pioneers of innovative techniques, but also as bridges between methodological and clinical approaches that foster diversification and advancement in the field of glioma classification research.

Our approach to presenting and highlighting connections between articles differs from the findings reported in the bibliometric data we reviewed. For

example, studies such as those conducted by [97] and [75] focused their analysis on both the validity of biomarkers and the effectiveness of specific diagnostic techniques to examine how these studies interrelate with the broader knowledge network on glioma, which increased the number of significant articles. In contrast, the results we obtained by applying KRA suggest that only a small number of cited articles play a key role in connecting different research paradigms, as is the case with the integration of advanced imaging techniques with molecular methods for more accurate classification, seeking to show that the evolution of knowledge is neither linear nor hierarchical but depends on an interconnected set of studies that, although not the most cited, serve as a bridge and facilitate the advancement and fusion of multiple disciplines. Additionally, our approach also differs from the contributions of [35, 41] and [12] in that they connect the literature on gliomas with topics generally related to aspects such as predictive models or cognitive impairment without addressing how the studies relate to disease classification or how classification criteria could be expanded through social factors.

Another aspect we seek to highlight from the network perspective applied to bibliometric data is the identification of densely connected substructures in the citation network through k-core analysis. While the systematic reviews collected in Table 1 focused mainly on obtaining traditional impact metrics, the approach implemented in our work sought to section and navigate the network to identify research communities that are not only influential due to their number of citations but also act as hubs where diverse lines of research converge. For example, the identification of substructures revealed the presence of research integrating genomic biomarkers with statistical modeling techniques, suggesting a move towards personalization and increased treatment accuracy and efficacy, which had not been sufficiently addressed in previous studies. Within the framework of these ideas, the application of k-core analysis also provided insight into the low degree of integration of social and behavioral factors. While [50] and [44] reported an initial exploration of these aspects, our results show that these works are underrepresented in key knowledge pathways. This suggests that, despite recognizing their importance, systematic integration of these factors into glioma research has not yet been achieved.

Our study found that the social factors incorporated into the studies that make up the network under study are those that affect quality of life, such as depression and cognitive function. We also found that age, gender, and geographic region are often used as composite indices made up of income, poverty, and education as proxies to indicate that socioeconomic status can predict disease incidence and survival rates. Other social factors that we identified and that intersect with molecular classification are the type of social coverage of the patient and the type

of hospital infrastructure to which they have access as determinants of access to testing and treatment. In this regard, the work of [31] reinforces the idea that access to treatment, as well as hospital costs, are social determinants with a classificatory impact. The work of [20] recognizes ethnicity as a social dimension of disease that modulates the distribution of glioblastoma subtypes as well as clinical decisions for classification. However, to gain a more comprehensive understanding of how social factors influence treatment and disease staging, it is recommended to consider factors such as indicators of socioeconomic disadvantage at the neighborhood level, which incorporate income, education, employment, and environmental conditions. According to [97], the above is associated with incidence and survival in gliomas. As these are open and georeferenced metrics, they would strengthen their deployment and the reproducibility of records. In other words, co-stratification coupled with the WHO molecular class would allow for the a priori identification of patients at risk of diagnostic delays, under-resourcing, or treatment discontinuity and activate specific referral and support circuits. Another indicator that is not included in current classification frameworks is financial access, which adds sociocultural aspects that serve as bridges or gateways to the therapeutic circuit, such as health literacy. According to [21], patients with limited language proficiency face greater barriers to accessing cancer trials and increase the gap in the use of telemedicine, so measuring this could add actionable information to ensure that molecular stratification translates into informed decisions and adequate adherence. Another factor underrepresented in the articles reviewed is environmental and support factors, i.e., housing stability, food security, and access to informal support networks.

The contribution of our work lies in the construction of an integrative framework for exploring research on glioma classification that explicitly incorporates structural data derived from network analysis to capture the central evolutionary trajectory of the research area of interest. It also provides a robust alternative for questioning the body of knowledge in a network. For example, we explicitly question the representation of social determinants considered in classification processes. Our approach differs from conventional bibliometric reviews by integrating three techniques from graph theory and, unlike studies that report aggregate counts, co-citation, or co-occurrence of terms, the approach we adopted takes into account the temporal directionality of the influence of scientific works, structures the backbone of the field and allows us to find critical paths with high betweenness that may be inadvertently overlooked or insignificant for traditional approaches or when only the citation frequency of articles is prioritized.

The decomposition of the network using k-core analysis allowed us to find and delimit dense knowledge clusters, helping to distinguish methodological peripheries

with disruptive potential. It should be noted that this approach to topology not only considers the most cited articles but also detects less cited but structurally crucial bridge works, providing a more granular reading of the dynamics of consolidation and paradigm shift that escape the scope of traditional metrics such as the h-index. In this sense, we believe that the methodological implications for interdisciplinary research are direct, as the overlap of the three techniques used to study the same network allowed us to find points of convergence between fields such as genomics and epigenetics, radiomics and neuroimaging, and population epidemiology, and to locate articles that link previously fragmented communities. Therefore, this type of structural reading would provide areas of opportunity for the design and operationalization of collaborations and for incorporating different layers of variables, such as clinical and social variables, in a reproducible manner. In other words, the same workflow allows for expansion into multimodal networks where imaging, genetics, and demography intersect, maintaining temporal consistency and the traceability of theoretical-methodological concordances. Subsequently, the methodological proposal allows us to move from the descriptive level and become a tool that enables professionals and practitioners to align laboratory, clinical, and public health agendas.

## CONCLUSIONS

We consider this article different from other systematic literature review papers on gliomas because it utilized a robust network analysis approach. Previous systematic reviews tend to focus on identifying and evaluating studies on conceptual structure (word network) and prominent authors and institutions without delving into how these elements interact with social and quality-of-life factors.

Based on the citation network analysis, we answer the questions posed at the end of the literature review. What disciplinary approaches influence the classification of gliomas? A convergence of multiple disciplinary approaches has influenced the classification of gliomas. A review of the articles indicates that the disciplines most involved are neuropathology, genetics, epigenetics, bioinformatics, and clinical oncology. Historically, histopathology is considered the most relevant as it began with studies of cellular morphology and mitotic characteristics. However, with advances in molecular biology and genomics, the disciplinary focus has shifted to integrating genetic and epigenetic data. Genetics and epigenetics have been pivotal in identifying specific mutations, improving diagnostic accuracy, and providing crucial prognostic information. Bioinformatics has become critical for managing and analyzing large volumes of genomic and epigenomic data, enabling the identification of new subtypes of gliomas based on DNA methylation

profiles. The interaction of these disciplines has led to a new stage of glioma classification that is much more precise and personalized, aligning with the principles of precision medicine in oncology.

What factors have been considered to expand this classification? The review of the articles identified by the network analysis allows us to say that the broadening of the classification of gliomas has been driven by critical factors such as the need to improve diagnostic accuracy, prognostic ability, and treatment personalization. Integrating molecular biomarkers can be considered a critical factor that allows a more apparent distinction between different gliomas and helps identify subgroups of patients who may benefit from specific treatments. Another critical factor in broadening the classification of gliomas is DNA methylation profiles, which enrich the classification by epigenetic patterns and are helpful in cases where histopathological and genetic data are insufficient for a definitive diagnosis. Other factors that have served to strengthen the classification of these diseases are factors such as tumor heterogeneity, clonal evolution, and differences in the tumor microenvironment, which influence response to treatment and disease progression; this, in turn, has led to a move towards a more complex classification for more informed decision-making.

What social risk factors are associated with distinct glioma phenotypes? Although social risk factors are not explicitly mentioned in contextual terms in the studies reviewed, network analysis of the glioma literature suggests that factors affecting quality of life, such as depression, cognitive function, and other brain tumor-related symptoms, are intertwined and require a multidimensional approach for a deeper understanding of how social factors may influence disease management and staging. Specifically, the work of Coomans and Röttgering addressed the relationship between symptoms and quality of life in patients with diffuse gliomas.

There are several limitations of our work which we consider relevant to note to narrow and contextualize the scope of future work. First, we recognize that, at the time of completion, other articles may have been published that have not been included. Second, the data analyzed exclusively come from the Web of Science Core Collection, focusing on articles written in English from journals classified as Q1 or Q2. Although this aligns with our interest in constructing the paradigmatic core of the topic and taking advantage of the degree of metadata standardization, it may lead to a tendency to use high-impact journals with an Anglo-Saxon tradition, potentially underrepresenting publications in regional journals not indexed in the chosen database. Along these lines, it should be noted that we excluded gray literature, i.e., the construction of the networks did not consider technical reports, conference proceedings, or guidelines, which means that although the networks focused on

formally published literature, they have limitations in capturing the practical and organizational dimension of emerging classification approaches. Therefore, incorporating additional databases could further expand the citation network. Thirdly, despite modeling the temporal distribution of the references cited and mitigating the effects of recency, the study remains subject to age biases because, based on the medical practice of one of the authors, it takes as a starting point the classification reports proposed by the WHO. Additionally, more recent works have less time to accumulate citations, while older studies may be underrepresented due to obsolescence. Subsequently, the subgraphs presented as the main path, key route, and k-core reflect behavior documented in the literature, which has reached a certain level of citation maturity. In this regard, future studies could integrate our approach with dynamic analysis or alternative indicators to characterize emerging contributions further.

We also consider it pertinent to add that our perspective emphasizes structure through the use of directed graphs, represented by MPA, KRA, and k-core decomposition, because they allow us to preserve the temporal directionality of citations and, at the same time, analyze the propagation of classification frameworks throughout the literature. However, they were not used to analyze the full text of each article. Thus, the link between the identified structures and conceptual themes such as methylation, HDI, or imaging biomarkers was established through manual content analysis of key papers rather than through automatic topic modeling or semantic representation techniques. Despite these limitations, we believe it may be of interest to academics, as it offers an avenue for discussion to design future studies exploring the interactions among multiple biological and social variables and their impact on clinical outcomes, thereby providing a more solid basis for innovation in the classification and treatment of gliomas. From a practical perspective for medical professionals, the approach presented may offer a way to improve the assessment and treatment of patients with gliomas, taking into account social risk factors such as the patient's environment and support network, as well as traditional clinical symptoms. Neuro-oncology specialists can design more comprehensive treatment protocols and provide personalized care to glioma patients.

## APPENDIX A

List of steps performed in Pajek for citation network analysis:

————— Importing the .net file: —————

1. Open cite.net file.
  2. Click Info button for exploration [0 in the dialog box].
  3. Click on Network > Create network > Transform > Remove > Loops.
- Simplifying the graph

4. Now, remove multiple lines: Network > Create network > Transform > Remove > Multiple lines > Min value.
5. Change the label to: GliomaCite\_Simp
6. Export or save the network

————— Degree exploration: —————

- Indegree
7. Network > Create vector > Centrality > Degree > Input
  8. File > Vector > Change label → Saved as: 1Can\_Indeg.vec
- Outdegree
9. Network > Create vector > Centrality > Degree > Output
  10. File > Vector > Change label → Saved as: 1Can\_Outdeg.vec
- Alldegree
11. Network > Create vector > Centrality > Degree > All
  12. File > Vector > Change label → Saved as: 1Can\_Alldeg.vec

————— Product type: —————

- Read the simplified network
13. Read DC.clu
  14. Partition > Binarize Partition [1]
  15. File > Partition > Change Label → [base]
  16. Partition > Copy to Vector
  17. Network > Create New Network > Transform > Transpose 1-mode
  18. Operations > Network + Vector > Network \* Vector [1]
  19. Vector > Make Partition > Copy to Partition by Truncating
  20. Partition > Binarize Partition [1-\*]
  21. File > Partition > Change Label → [base neighbors]
  22. Select DC partition
  23. Partition > Binarize Partition [0]
  24. File > Partition > Change Label → [sources]
  25. Select base neighbors as SECOND PARTITION
  26. Partitions > Min (First, Second)
  27. File > Partition > Change Label → [basic sources]
  28. Partition > Binarize Partition [0] → Change label to complement
  29. Select sources as SECOND PARTITION
  30. Partitions > Min (First, Second)
  31. File > Partition > Change Label → [secondary sources]
  32. Select DC partition
  33. Partition > Binarize Partition [2]
  34. File > Partition > Change Label → [users]
  35. Save partitions base, users, basic, and secondary to files.

————— Boundary problem: —————

36. Select the simplified network
37. Network > Create Partition > Degree > Input
38. Partition > Binarize Partition [2-\*] (k1=1)

39. Select basic sources as Second Partition
40. Partitions > Min (First, Second)
41. File > Partition > Change Label → [basic and (indeg > 1)]
42. Select indegree partition
43. Partition > Binarize Partition [4-\*] (k2=3)
44. Select secondary sources as Second Partition
45. Partitions > Min (First, Second)
46. File > Partition > Change Label → [secondary and (indeg > 3)]
47. Select DC partition
48. Partition > Binarize Partition [1-\*]
49. Select secondary and (indeg > 3) as Second Partition
50. Partitions > Max (First, Second)
51. Select basic and (indeg > 1) as Second Partition
52. Partitions > Max (First, Second)
53. File > Partition > Change Label → [boundary]
54. Operations > Network + Partition > Extract Subnetwork [1]

————— Acyclic graph: —————

55. Select the CiteB or CancerCiteB network
56. Network > Create Partition > Components > Strong [2]
57. Operations > Network + Partition > Shrink Network [1 0]
58. Network > Create New Network > Transform > Line Values > Set All Line Values to 1 [No]
59. Network > Create New Network > Transform > Remove > Loops
60. Network > Acyclic Network > Create weighted Network + Vector > Transversal Weights > Search Path Count

————— Suggested by the reviewer: —————

- \*. Network > Acyclic Network > Create weighted Network + Vector > Transversal Weights > Search Path Link Count (SPLC).
- \*. Network > Acyclic Network > Create weighted Network + Vector > Transversal Weights > Search Path Node Pair (SPNP)

In this case, the network, partition, and vector were saved as

- 2CANCER\_CITE\_SPC
61. File > Network > Change label > 2CANCER\_CITE\_SPC
- Save as: 2CANCER\_CITE\_SPC
- This is the network that will be used for working and reporting results.

————— Main Path Extraction: —————

62. Network > Acyclic Network > Create SubNetwork > Main Path > Global Search > Standard

63. Network > Create Partition > Degree > All
64. Network > Create Vector > Centrality > Degree > All
65. File > Network > Change Label →[2CANCER\_MainPath]

————— Key Route Extraction: —————

66. Network > Acyclic Network > Create SubNetwork > Main  
Path > Global Search > Key Routes [1-10]
67. Network > Create Partition > Degree > All
68. Network > Create Vector > Centrality > Degree > All
69. File > Network > Change Label →[2CANCER\_KeyRoute]

## AUTHOR CONTRIBUTIONS

Both authors contributed equally to this study.

## CONFLICTS OF INTEREST

Authors have no conflicts of interest to declare.

## ETHICAL STATEMENT

This study involved no human participants, animal subjects, or identifiable personal data, and therefore required no ethical approval.

## FUNDING

No funding was used for this paper.

## REFERENCES

1. Luo J, Junaid M, Hamid N, Duan JJ, Yang X, Pei DS. Current understanding of gliomagenesis: from model to mechanism. *Int J Med Sci.* 2022; 19:2071–79. <https://doi.org/10.7150/ijms.77287>. [PubMed]
2. Silvani A. New perspectives: Glioma in adult patients. *Tumori.* 2023; 109:350–55. <https://doi.org/10.1177/03008916231159716>. [PubMed]
3. Guo X, Shi Y, Liu D, Li Y, Chen W, Wang Y, Wang Y, Xing H, Xia Y, Li J, Wu J, Liang T, Wang H, et al. Clinical updates on gliomas and implications of the 5th edition of the WHO classification of central nervous system tumors. *Front Oncol.* 2023; 13:1131642. <https://doi.org/10.3389/fonc.2023.1131642>. [PubMed]
4. Liu YY, Yao RQ, Long LY, Liu YX, Tao BY, Liu HY, Liu JL, Li Z, Chen L, Yao YM. Worldwide productivity and research trend of publications concerning glioma-associated macrophage/microglia: A bibliometric study. *Front Neurol.* 2022; 13:1047162. <https://doi.org/10.3389/fneur.2022.1047162>. [PubMed]
5. Ostrom QT, Bauchet L, Davis FG, Deltour I, Fisher JL, Langer CE, Pekmezci M, Schwartzbaum JA, Turner MC, Walsh KM, Wrensch MR, Barnholtz-Sloan JS. The epidemiology of glioma in adults: a “state of the science” review. *Neuro Oncol.* 2014; 16:896–13. <https://doi.org/10.1093/neuonc/nou087>. [PubMed]
6. Cheng K, Zhang H, Guo Q, Zhai P, Zhou Y, Yang W, Wang Y, Lu Y, Shen Z, Wu H. Emerging trends and research foci of oncolytic virotherapy for central nervous system tumors: A bibliometric study. *Front Immunol.* 2022; 13:975695. <https://doi.org/10.3389/fimmu.2022.975695>. [PubMed]
7. Szklener K, Mazurek M, Wieteska M, Waclawska M, Bilski M, Mańdziuk S. New Directions in the Therapy of Glioblastoma. *Cancers (Basel).* 2022; 14:5377. <https://doi.org/10.3390/cancers14215377>. [PubMed]
8. Li R, Huang Q, Ye C, Wu C, Luo N, Lu Y, Fang J, Wang Y. Bibliometric and visual analysis in the field of ketogenic diet on cancer from 2012 to 2021. *Front Nutr.* 2022; 9:1060436. <https://doi.org/10.3389/fnut.2022.1060436>. [PubMed]
9. Zhao Y, Xiao Y, Hu Z, Wang J, Xu Z, Mo Y, Qi G, Chen K, Wu W, Ma W. Bibliometric analysis of single-cell sequencing researches on immune cells and their application of DNA damage repair in cancer immunotherapy. *Front Oncol.* 2023; 13:1067305. <https://doi.org/10.3389/fonc.2023.1067305>. [PubMed]
10. Xiao Y, Watson M. Guidance on Conducting a Systematic Literature Review. *J Plan Educ Res.* 2019; 39:93–112. <https://doi.org/10.1177/0739456X17723971>.
11. Yang X, Man D, Zhao P, Li X. Quantitative study of bioinformatics analysis on glioma: a bibliometric analysis. *Front Oncol.* 2023; 13:1222797. <https://doi.org/10.3389/fonc.2023.1222797>. [PubMed]
12. Song S, Wu H, Wang F, Jiao J, Xu L, Wang H, Tong X, Yan H. Global research trends and hotspots on glioma stem cells. *Front Oncol.* 2022; 12:926025. <https://doi.org/10.3389/fonc.2022.926025>. [PubMed]
13. Batagelj V, Cerinšek M. On bibliographic networks. *Scientometrics.* 2013; 96:845–64. <https://doi.org/10.1007/s11192-012-0940-1>.
14. Mongeon P, Paul-Hus A. The journal coverage of Web of Science and Scopus: a comparative analysis. *Scientometrics.* 216; 106:213–28. <https://doi.org/10.1007/s11192-015-1765-5>.
15. Wang Y, Chen Q, Dang X, Lu W, Zhang X, Yan H, Niu S, Yan X, Yan J. A bibliometric analysis on traumatic brain injury in forensic medicine of a half-century (1972-2021). *Front Neurol.* 2023; 14:913855. <https://doi.org/10.3389/fneur.2023.913855>. [PubMed]
16. Tiwari A, Srivastava S, Pant M. Brain tumor segmentation and classification from magnetic resonance images: Review of selected methods from 2014 to 2019. *Pattern Recognit Lett.* 2020; 131:244–60. <https://doi.org/10.1016/j.patrec.2019.11.020>.

17. Sahn F, Brandner S, Bertero L, Capper D, French PJ, Figarella-Branger D, Giangaspero F, Haberler C, Hegi ME, Kristensen BW, Kurian KM, Preusser M, Tops BBJ, et al. Molecular diagnostic tools for the World Health Organization (WHO) 2021 classification of gliomas, glioneuronal and neuronal tumors; an EANO guideline. *Neuro Oncol.* 2023; 25:1731–49. <https://doi.org/10.1093/neuonc/noad100>. [PubMed]
18. Feng C, Wu Y, Gao L, Guo X, Wang Z, Xing B. Publication Landscape Analysis on Gliomas: How Much Has Been Done in the Past 25 Years? *Front Oncol.* 2020; 9:1463. <https://doi.org/10.3389/fonc.2019.01463>. [PubMed]
19. Torp SH, Solheim O, Skjulsvik AJ. The WHO 2021 Classification of Central Nervous System tumours: a practical update on what neurosurgeons need to know—a minireview. *Acta Neurochir (Wien).* 2022; 164:2453–64. <https://doi.org/10.1007/s00701-022-05301-y>. [PubMed]
20. Blümcke I, Coras R, Wefers AK, Capper D, Aronica E, Becker A, Honavar M, Stone TJ, Jacques TS, Miyata H, Mühlebner A, Pimentel J, Söylemezoğlu F, Thom M. Review: Challenges in the histopathological classification of ganglioglioma and DNT: microscopic agreement studies and a preliminary genotype-phenotype analysis. *Neuropathol Appl Neurobiol.* 2019; 45:95–107. <https://doi.org/10.1111/nan.12522>. [PubMed]
21. Cai B, Zhang Y, Wang Z, Xu D, Jia Y, Guan Y, Liao A, Liu G, Chun C, Li J. Therapeutic Potential of Diosgenin and Its Major Derivatives against Neurological Diseases: Recent Advances. *Oxid Med Cell Longev.* 2020; 2020:3153082. <https://doi.org/10.1155/2020/3153082>. [PubMed]
22. Huang W, Sun G, Wang Q, Long Z. The research progress of targeted therapy in acute myeloid leukemia based on bibliometric analysis. *Front Oncol.* 2022; 12:957370. <https://doi.org/10.3389/fonc.2022.957370>. [PubMed]
23. Kalaroopan D, Lasocki A. MRI-based deep learning techniques for the prediction of isocitrate dehydrogenase and 1p/19q status in grade 2–4 adult gliomas. *J Med Imaging Radiat Oncol.* 2023; 67:492–98. <https://doi.org/10.1111/1754-9485.13522>. [PubMed]
24. Omidi Y, Kianinejad N, Kwon Y, Omidian H. Drug delivery and targeting to brain tumors: considerations for crossing the blood-brain barrier. *Expert Rev Clin Pharmacol.* 2021; 14:357–81. <https://doi.org/10.1080/17512433.2021.1887729>. [PubMed]
25. Jones J, Nguyen H, Drummond K, Morokoff A. Circulating Biomarkers for Glioma: A Review. *Neurosurgery.* 2021; 88:E221–30. <https://doi.org/10.1093/neuros/nyaa540>. [PubMed]
26. Lilo T, Morais CLM, Shenton C, Ray A, Gurusinge N. Revising Fourier-transform infrared (FT-IR) and Raman spectroscopy towards brain cancer detection. *Photodiagnosis Photodyn Ther.* 2022; 38:102785. <https://doi.org/10.1016/j.pdpdt.2022.102785>. [PubMed]
27. Cooney TM, Lubanszky E, Prasad R, Hawkins C, Mueller S. Diffuse midline glioma: review of epigenetics. *J Neurooncol.* 2020; 150:27–34. <https://doi.org/10.1007/s11060-020-03553-1>. [PubMed]
28. Jang K, Russo C, Di Ieva A. Radiomics in gliomas: clinical implications of computational modeling and fractal-based analysis. *Neuroradiology.* 2020; 62:771–90. <https://doi.org/10.1007/s00234-020-02403-1>. [PubMed]
29. Delgado-López PD, Saiz-López P, Gargini R, Sola-Vendrell E, Tejada S. A comprehensive overview on the molecular biology of human glioma: what the clinician needs to know. *Clin Transl Oncol.* 2020; 22:1909–22. <https://doi.org/10.1007/s12094-020-02340-8>. [PubMed]
30. Ameratunga M, Pavlakis N, Wheeler H, Grant R, Simes J, Khasraw M. Anti-angiogenic therapy for high-grade glioma. *Cochrane Database Syst Rev.* 2018; 11:CD008218. <https://doi.org/10.1002/14651858.CD008218.pub4>. [PubMed]
31. Akmal M, Hasnain N, Rehan A, Iqbal U, Hashmi S, Fatima K, Farooq MZ, Khosa F, Siddiqi J, Khan MK. Glioblastome Multiforme: A Bibliometric Analysis. *World Neurosurg.* 2020; 136:270–82. <https://doi.org/10.1016/j.wneu.2020.01.027>. [PubMed]
32. Bhandari M, Raj S, Kumar A, Kaur DP. Bibliometric analysis on exploitation of biogenic gold and silver nanoparticles in breast, ovarian and cervical cancer therapy. *Front Pharmacol.* 2022; 13:1035769. <https://doi.org/10.3389/fphar.2022.1035769>. [PubMed]
33. Zhang Y, Lim D, Yao Y, Dong C, Feng Z. Global Research Trends in Radiotherapy for Gliomas: A Systematic Bibliometric Analysis. *World Neurosurg.* 2022; 161:e355–62. <https://doi.org/10.1016/j.wneu.2022.02.001>. [PubMed]
34. Clement P, Booth T, Borovečki F, Emblem KE, Figueiredo P, Hirschler L, Jančálek R, Keil VC, Maumet C, Özsunar Y, Pernet C, Petr J, Pinto J, et al. GliMR: Cross-Border Collaborations to Promote Advanced MRI Biomarkers for Glioma. *J Med Biol Eng.* 2021; 41:115–25. <https://doi.org/10.1007/s40846-020-00582-z>. [PubMed]
35. Luo J, Shi Y, Wang X, Zhang R, Chen S, Yu W, Su D, Tian J. A 20-Year Research Trend Analysis of the Influence of Anesthesia on Tumor Prognosis Using Bibliometric Methods. *Front Oncol.* 2021; 11:683232. <https://doi.org/10.3389/fonc.2021.683232>. [PubMed]
36. Rechberger JS, Thiele F, Daniels DJ. Status Quo and Trends of Intra-Arterial Therapy for Brain Tumors: A Bibliometric and Clinical Trials Analysis. *Pharmaceutics.* 2021; 13:1885. <https://doi.org/10.3390/pharmaceutics13111885>. [PubMed]
37. Marcus HJ, Vakharia VN, Ourselin S, Duncan J, Tisdall M, Aquilina K. Robot-assisted stereotactic brain biopsy: systematic review and bibliometric analysis. *Childs Nerv Syst.* 2018; 34:1299–309. <https://doi.org/10.1007/s00381-018-3821-y>. [PubMed]
38. Ibrahim M. Artificial Intelligence and Machine Learning in Oncology: Historical Overview of Documents Indexed in the Web of Science Database. *Eurasian J Med Oncol.* 2021; 5:239–48. <https://doi.org/10.14744/ejmo.2021.24856>.

39. Cui J, Miao X, Yanghao X, Qin X. Bibliometric research on the developments of artificial intelligence in radiomics toward nervous system diseases. *Front Neurol.* 2023; 14:1171167. <https://doi.org/10.3389/fneur.2023.1171167>. [PubMed]
40. Abrigo JM, Fountain DM, Provenzale JM, Law EK, Kwong JS, Hart MG, Tam WWS. Magnetic resonance perfusion for differentiating low-grade from high-grade gliomas at first presentation. *Cochrane Database Syst Rev.* 2018; 1:CD011551. <https://doi.org/10.1002/14651858.CD011551.pub2>. [PubMed]
41. Pertz M, Popkirov S, Schlegel U, Thoma P. Research on cognitive and sociocognitive functions in patients with brain tumours: a bibliometric analysis and visualization of the scientific landscape. *Neurol Sci.* 2020; 41:1437–49. <https://doi.org/10.1007/s10072-020-04276-x>. [PubMed]
42. Zhang D, Zhu W, Guo J, Chen W, Gu X. Application of artificial intelligence in glioma researches: A bibliometric analysis. *Front Oncol.* 2022; 12:978427. <https://doi.org/10.3389/fonc.2022.978427>. [PubMed]
43. Coomans MB, Dirven L, Aaronson NK, Baumert BG, Van Den Bent M, Bottomley A, Brandes AA, Chinot O, Coens C, Gorlia T, Herrlinger U, Keime-Guibert F, Malmström A, et al. Symptom clusters in newly diagnosed glioma patients: which symptom clusters are independently associated with functioning and global health status? *Neuro Oncol.* 2019; 21:1447–57. <https://doi.org/10.1093/neuonc/noz118>. [PubMed]
44. Murrell AJ, Rimmer B, Dutton L, Lewis J, Burns R, Gallagher P, Williams S, Araújo-Soares V, Finch T, Sharp L. The Nature and Quality of Support from Informal Networks for Informal Caregivers of Low-Grade Glioma Patients: A Qualitative Analysis within the Ways Ahead Study. *Eur J Cancer Care (Engl).* 2023; 1–12. <https://doi.org/10.1155/2023/4149412>.
45. Röttgering JG, Varkevisser TMC, Gorter M, Belgers V, De Witt Hamer PC, Reijneveld JC, Klein M, Blanken TF, Douw L. Symptom networks in glioma patients: understanding the multidimensionality of symptoms and quality of life. *J Cancer Surviv.* 2024; 18:1032–41. <https://doi.org/10.1007/s11764-023-01355-8>. [PubMed]
46. Borsboom D, Deserno MK, Rhemtulla M, Epskamp S, Fried EI, McNally RJ, Robinaugh DJ, Perugini M, Dalege J, Costantini G, Isvoranu AM, Wysocki AC, van Borkulo CD, et al. Network analysis of multivariate data in psychological science. *Nat Rev Methods Primers.* 2021; 1:58. <https://doi.org/10.1038/s43586-021-00055-w>.
47. Lopes MB, Martins EP, Vinga S, Costa BM. The Role of Network Science in Glioblastoma. *Cancers (Basel).* 2021; 13:1045. <https://doi.org/10.3390/cancers13051045>. [PubMed]
48. Maltseva D, Batagelj V. Towards a systematic description of the field using keywords analysis: main topics in social networks. *Scientometrics.* 2020; 123:357–82. <https://doi.org/10.1007/s11192-020-03365-0>.
49. Louis DN, Perry A, Reifenberger G, von Deimling A, Figarella-Branger D, Cavenee WK, Ohgaki H, Wiestler OD, Kleihues P, Ellison DW. The 2016 World Health Organization Classification of Tumors of the Central Nervous System: a summary. *Acta Neuropathol.* 2016; 131:803–20. <https://doi.org/10.1007/s00401-016-1545-1>. [PubMed]
50. Louis DN, Perry A, Wesseling P, Brat DJ, Cree IA, Figarella-Branger D, Hawkins C, Ng HK, Pfister SM, Reifenberger G, Soffiotti R, von Deimling A, Ellison DW. The 2021 WHO Classification of Tumors of the Central Nervous System: a summary. *Neuro Oncol.* 2021; 23:1231–51. <https://doi.org/10.1093/neuonc/noab106>. [PubMed]
51. Capper D, Jones DTW, Sill M, Hovestadt V, Schrimpf D, Sturm D, Koelsche C, Sahm F, Chavez L, Reuss DE, Kratz A, Wefers AK, Huang K, et al. DNA methylation-based classification of central nervous system tumours. *Nature.* 2018; 555:469–74. <https://doi.org/10.1038/nature26000>. [PubMed]
52. Stichel D, Schrimpf D, Casalini B, Meyer J, Wefers AK, Sievers P, Korshunov A, Koelsche C, Reuss DE, Reinhardt A, Ebrahimi A, Fernández-Klett F, Kessler T, et al. Routine RNA sequencing of formalin-fixed paraffin-embedded specimens in neuropathology diagnostics identifies diagnostically and therapeutically relevant gene fusions. *Acta Neuropathol.* 2019; 138:827–35. <https://doi.org/10.1007/s00401-019-02039-3>. [PubMed]
53. Sabharwal R, Miah SJ. An intelligent literature review: adopting inductive approach to define machine learning applications in the clinical domain. *J Big Data.* 2022; 9:53. <https://doi.org/10.1186/s40537-022-00605-3>.
54. Komori T. Grading of adult diffuse gliomas according to the 2021 WHO Classification of Tumors of the Central Nervous System. *Lab Invest.* 2022; 102:126–33. <https://doi.org/10.1038/s41374-021-00667-6>. [PubMed]
55. Eom YH, Fortunato S. Characterizing and modeling citation dynamics. *PLoS One.* 2011; 6:e24926. <https://doi.org/10.1371/journal.pone.0024926>. [PubMed]
56. Carrera-Rivera A, Ochoa W, Larrinaga F, Lasa G. How-to conduct a systematic literature review: A quick guide for computer science research. *MethodsX.* 2022; 9:101895. <https://doi.org/10.1016/j.mex.2022.101895>. [PubMed]
57. Batagelj V. WoS2Pajek. Networks from Web of Science. Version 1.5. <http://vldowiki.fmf.uni-lj.si/doku.php?id=pajek:wos2pajek>.
58. Yan E, Ding Y. Scholarly Networks Analysis. In: *Encyclopedia of Social Network Analysis and Mining*. New York, NY: Springer. 2014; 1643–51. [https://doi.org/10.1007/978-1-4614-6170-8\\_249](https://doi.org/10.1007/978-1-4614-6170-8_249).
59. Donthu N, Kumar S, Mukherjee D, Pandey N, Lim WM. How to conduct a bibliometric analysis: An overview and guidelines. *J Bus Res.* 2021; 133:285–96. <https://doi.org/10.1016/j.jbusres.2021.04.070>.
60. Maltseva D, Batagelj V. Collaboration between authors in the field of social network analysis. *Scientometrics.* 2022; 127:3437–70. <https://doi.org/10.1007/s11192-022-04364-z>.

61. De Nooy W, Mrvar A, Batagelj V. Exploratory Social Network Analysis with Pajek. Cambridge University Press. 2018. <https://doi.org/10.1017/9781108565691>.
62. Batagelj V, Doreian P, Ferligoj A, Kežnar N. Understanding Large Temporal Networks and Spatial Networks. Wiley. 2014. <https://doi.org/10.1002/9781118915370>.
63. Price DJ. Networks of scientific papers. *Science*. 1965; 149:510–15. <https://doi.org/10.1126/science.149.3683.510>. [PubMed]
64. Rawlings CM, Smith JA, Moody J, McFarland DA. Network Analysis. Cambridge: Cambridge University Press. 2023. <https://doi.org/10.1017/9781139794985>.
65. Hummon NP, Dereian P. Connectivity in a citation network: The development of DNA theory. *Soc Networks*. 1989; 11:39–63. [https://doi.org/10.1016/0378-8733\(89\)90017-8](https://doi.org/10.1016/0378-8733(89)90017-8).
66. Bailón-Elvira JC, Cobo MJ, Herrera-Viedma E, López-Herrera AG. Latent Dirichlet Allocation (LDA) for improving the topic modeling of the official bulletin of the spanish state (BOE). *Procedia Comput Sci*. 2019; 162:207–14. <https://doi.org/10.1016/j.procs.2019.11.277>.
67. Javed MA, Younis MS, Latif S, Qadir J, Baig A. Community detection in networks: A multidisciplinary review. *Journal of Network and Computer Applications*. 2018; 108:87–111. <https://doi.org/10.1016/j.jnca.2018.02.011>.
68. Wang J. Citation time window choice for research impact evaluation. *Scientometrics*. 2013; 94:851–72. <https://doi.org/10.1007/s11192-012-0775-9>.
69. (Kevin) Chae B. Mapping the Evolution of Digital Business Research: A Bibliometric Review. *Sustainability*. 2022; 14:6990. <https://doi.org/10.3390/su14126990>.
70. Redner R. How popular is your paper? An empirical study of the citation distribution. *Eur Phys J B*. 1998; 4:131–34. <https://doi.org/10.1007/s100510050359>.
71. Viiu GA. The lognormal distribution explains the remarkable pattern documented by characteristic scores and scales in scientometrics. *J Informetr*. 2018; 12:401–15. <https://doi.org/10.1016/j.joi.2018.02.002>.
72. Kong YX, Shi GY, Wu RJ, Zhang YC. *k*-core: Theories and applications. *Phys Rep*. 2019; 832:1–32. <https://doi.org/10.1016/j.physrep.2019.10.004>.
73. Redner S. Citation Statistics from 110 Years of Physical Review. *Phys Today*. 2005; 58:49–54. <https://doi.org/10.1063/1.1996475>.
74. Krichevsky AM, Uhlmann EJ. Oligonucleotide Therapeutics as a New Class of Drugs for Malignant Brain Tumors: Targeting mRNAs, Regulatory RNAs, Mutations, Combinations, and Beyond. *Neurotherapeutics*. 2019; 16:319–47. <https://doi.org/10.1007/s13311-018-00702-3>. [PubMed]
75. Weller M, Wen PY, Chang SM, Dirven L, Lim M, Monje M, Reifenberger G. Glioma. *Nat Rev Dis Primers*. 2024; 10:33. <https://doi.org/10.1038/s41572-024-00516-y>. [PubMed]
76. Ius T, Sabatino G, Panciani PP, Fontanella MM, Rudà R, Castellano A, Barbagallo GMV, Belotti F, Boccaletti R, Catapano G, Costantino G, Della Puppa A, Di Meco F, et al. Surgical management of Glioma Grade 4: technical update from the neuro-oncology section of the Italian Society of Neurosurgery (SINch®): a systematic review. *J Neurooncol*. 2023; 162:267–93. <https://doi.org/10.1007/s11060-023-04274-x>. [PubMed]
77. Śledzińska P, Bebyn MG, Furtak J, Kowalewski J, Lewandowska MA. Prognostic and Predictive Biomarkers in Gliomas. *Int J Mol Sci*. 2021; 22:10373. <https://doi.org/10.3390/ijms221910373>. [PubMed]
78. Stupp R, Mason WP, van den Bent MJ, Weller M, Fisher B, Taphoorn MJ, Belanger K, Brandes AA, Marosi C, Bogdahn U, Curschmann J, Janzer RC, Ludwin SK, et al, and European Organisation for Research and Treatment of Cancer Brain Tumor and Radiotherapy Groups, and National Cancer Institute of Canada Clinical Trials Group. Radiotherapy plus concomitant and adjuvant temozolomide for glioblastoma. *N Engl J Med*. 2005; 352:987–96. <https://doi.org/10.1056/NEJMoa043330>. [PubMed]
79. Brat DJ, Verhaak RG, Aldape KD, Yung WK, Salama SR, Cooper LA, Rheinbay E, Miller CR, Vitucci M, Morozova O, Robertson AG, Noushmehr H, Laird PW, et al, and Cancer Genome Atlas Research Network. Comprehensive, Integrative Genomic Analysis of Diffuse Lower-Grade Gliomas. *N Engl J Med*. 2015; 372:2481–98. <https://doi.org/10.1056/NEJMoa1402121>. [PubMed]
80. Yan H, Parsons DW, Jin G, McLendon R, Rasheed BA, Yuan W, Kos I, Batinic-Haberle I, Jones S, Riggins GJ, Friedman H, Friedman A, Reardon D, et al. IDH1 and IDH2 mutations in gliomas. *N Engl J Med*. 2009; 360:765–73. <https://doi.org/10.1056/NEJMoa0808710>. [PubMed]
81. Eckel-Passow JE, Lachance DH, Molinaro AM, Walsh KM, Decker PA, Sicotte H, Pekmezci M, Rice T, Kosel ML, Smirnov IV, Sarkar G, Caron AA, Kollmeier TM, et al. Glioma Groups Based on 1p/19q, IDH, and TERT Promoter Mutations in Tumors. *N Engl J Med*. 2015; 372:2499–08. <https://doi.org/10.1056/NEJMoa1407279>. [PubMed]
82. Reinhardt A, Stichel D, Schrimpf D, Sahn F, Korshunov A, Reuss DE, Koelsche C, Huang K, Wefers AK, Hovestadt V, Sill M, Gramatzki D, Felsberg J, et al. Anaplastic astrocytoma with piloid features, a novel molecular class of IDH wildtype glioma with recurrent MAPK pathway, CDKN2A/B and ATRX alterations. *Acta Neuropathol*. 2018; 136:273–91. <https://doi.org/10.1007/s00401-018-1837-8>. [PubMed]
83. Brat DJ, Aldape K, Colman H, Holland EC, Louis DN, Jenkins RB, Kleinschmidt-DeMasters BK, Perry A, Reifenberger G, Stupp R, von Deimling A, Weller M. cIMPACT-NOW update 3: recommended diagnostic criteria for “Diffuse astrocytic glioma, IDH-wildtype, with molecular features of glioblastoma, WHO grade IV”. *Acta Neuropathol*. 2018; 136:805–10. <https://doi.org/10.1007/s00401-018-1913-0>. [PubMed]
84. Yang RR, Shi ZF, Zhang ZY, Chan AK, Aibaidula A, Wang WW, Kwan JSH, Poon WS, Chen H, Li WC, Chung NY, Punchhi G, Chu WC, et al. IDH mutant lower grade (WHO

- Grades II/III) astrocytomas can be stratified for risk by CDKN2A, CDK4 and PDGFRA copy number alterations. *Brain Pathol.* 2020; 30:541–53. <https://doi.org/10.1111/bpa.12801>. [PubMed]
85. Brat DJ, Aldape K, Colman H, Figarella-Branger D, Fuller GN, Giannini C, Holland EC, Jenkins RB, Kleinschmidt-DeMasters B, Komori T, Kros JM, Louis DN, McLean C, et al. cIMPACT-NOW update 5: recommended grading criteria and terminologies for IDH-mutant astrocytomas. *Acta Neuropathol.* 2020; 139:603–8. <https://doi.org/10.1007/s00401-020-02127-9>. [PubMed]
  86. Ostrom QT, Cioffi G, Waite K, Kruchko C, Barnholtz-Sloan JS. CBTRUS Statistical Report: Primary Brain and Other Central Nervous System Tumors Diagnosed in the United States in 2014-2018. *Neuro Oncol.* 2021 (Suppl 2); 23:iii1–105. <https://doi.org/10.1093/neuonc/noab200>. [PubMed]
  87. Tavelin B, Malmström A. Sex Differences in Glioblastoma-Findings from the Swedish National Quality Registry for Primary Brain Tumors between 1999-2018. *J Clin Med.* 2022; 11:486. <https://doi.org/10.3390/jcm11030486>. [PubMed]
  88. Kim M, Kim S, Park YW, Han K, Ahn SS, Moon JH, Kim EH, Kim J, Kang SG, Chang JH, Kim SH, Lee SK. Sex as a prognostic factor in adult-type diffuse gliomas: an integrated clinical and molecular analysis according to the 2021 WHO classification. *J Neurooncol.* 2022; 159:695–703. <https://doi.org/10.1007/s11060-022-04114-4>. [PubMed]
  89. Park YW, Park KS, Park JE, Ahn SS, Park I, Kim HS, Chang JH, Lee SK, Kim SH. Qualitative and Quantitative Magnetic Resonance Imaging Phenotypes May Predict CDKN2A/B Homozygous Deletion Status in Isocitrate Dehydrogenase-Mutant Astrocytomas: A Multicenter Study. *Korean J Radiol.* 2023; 24:133–44. <https://doi.org/10.3348/kjr.2022.0732>. [PubMed]
  90. Malik P, Soliman R, Chen YA, Munoz DG, Das S, Bharatha A, Mathur S. Patterns of T2-FLAIR discordance across a cohort of adult-type diffuse gliomas and deviations from the classic T2-FLAIR mismatch sign. *Neuroradiology.* 2024; 66:521–30. <https://doi.org/10.1007/s00234-024-03297-z>. [PubMed]
  91. Ikeda S, Sakata A, Arakawa Y, Mineharu Y, Makino Y, Takeuchi Y, Fushimi Y, Okuchi S, Nakajima S, Otani S, Nakamoto Y. Clinical and imaging characteristics of supratentorial glioma with IDH2 mutation. *Neuroradiology.* 2024; 66:973–81. <https://doi.org/10.1007/s00234-024-03361-8>. [PubMed]
  92. von Deimling A, Ono T, Shirahata M, Louis DN. Grading of Diffuse Astrocytic Gliomas: A Review of Studies Before and After the Advent of IDH Testing. *Semin Neurol.* 2018; 38:19–23. <https://doi.org/10.1055/s-0038-1636430>. [PubMed]
  93. Shirahata M, Ono T, Stichel D, Schrimpf D, Reuss DE, Sahm F, Koelsche C, Wefers A, Reinhardt A, Huang K, Sievers P, Shimizu H, Nanjo H, et al. Novel, improved grading system(s) for IDH-mutant astrocytic gliomas. *Acta Neuropathol.* 2018; 136:153–66. <https://doi.org/10.1007/s00401-018-1849-4>. [PubMed]
  94. Capper D, Stichel D, Sahm F, Jones DTW, Schrimpf D, Sill M, Schmid S, Hovestadt V, Reuss DE, Koelsche C, Reinhardt A, Wefers AK, Huang K, et al. Practical implementation of DNA methylation and copy-number-based CNS tumor diagnostics: the Heidelberg experience. *Acta Neuropathol.* 2018; 136:181–10. <https://doi.org/10.1007/s00401-018-1879-y>. [PubMed]
  95. Hou Y, Pinheiro J, Sahm F, Reuss DE, Schrimpf D, Stichel D, Casalini B, Koelsche C, Sievers P, Wefers AK, Reinhardt A, Ebrahimi A, Fernández-Klett F, et al. Papillary glioneuronal tumor (PGNT) exhibits a characteristic methylation profile and fusions involving PRKCA. *Acta Neuropathol.* 2019; 137:837–46. <https://doi.org/10.1007/s00401-019-01969-2>. [PubMed]
  96. Schepke E, Löfgren M, Pietsch T, Bontell TO, Kling T, Wenger A, Vega SF, Danielsson A, Dosa S, Holm S, Öberg A, Nyman P, Eliasson-Hofvander M, et al. DNA methylation profiling improves routine diagnosis of paediatric central nervous system tumours: A prospective population-based study. *Neuropathol Appl Neurobiol.* 2022; 48:e12838. <https://doi.org/10.1111/nan.12838>. [PubMed]
  97. Brat DJ, Aldape K, Bridge JA, Canoll P, Colman H, Hameed MR, Harris BT, Hattab EM, Huse JT, Jenkins RB, Lopez-Terrada DH, McDonald WC, Rodriguez FJ, et al. Molecular Biomarker Testing for the Diagnosis of Diffuse Gliomas. *Arch Pathol Lab Med.* 2022; 146:547–74. <https://doi.org/10.5858/arpa.2021-0295-CP>. [PubMed]
